# Supplementary material for: Migraine, tension-type headache and medication-overuse headache in a large population of shift working nurses: a cross-sectional study in Norway
Source: PubMed Central journal article supplement — BMJ Open. 2018 Nov 18;8(11):e022403. doi: 10.1136/bmjopen-2018-022403 (PMC6252763; doi:10.1136/bmjopen-2018-022403), 2018-11-18
Supplement: bmjopen-2018-022403.draft_revisions.pdf [file bmjopen-2018-022403.draft_revisions.pdf]

# BMJ Open

BMJ Open is committed to open peer review. As part of this commitment we make the peer review history of every article we publish publicly available.

When an article is published we post the peer reviewers' comments and the authors' responses online. We also post the versions of the paper that were used during peer review. These are the versions that the peer review comments apply to.

The versions of the paper that follow are the versions that were submitted during the peer review process. They are not the versions of record or the final published versions. They should not be cited or distributed as the published version of this manuscript.

BMJ Open is an open access journal and the full, final, typeset and author-corrected version of record of the manuscript is available on our site with no access controls, subscription charges or pay-per-view fees (<http://bmjopen.bmj.com>).

If you have any questions on BMJ Open's open peer review process please email [info.bmjopen@bmj.com](mailto:info.bmjopen@bmj.com)

# BMJ Open

## Migraine, tension-type headache and medication-overuse headache in a large population of shift working nurses

|                               |                                                                                                                                                                                                                                                                                                                                                                                                                                                                                                                                                                                                                                                                                                                                                                                                                                           |
|-------------------------------|-------------------------------------------------------------------------------------------------------------------------------------------------------------------------------------------------------------------------------------------------------------------------------------------------------------------------------------------------------------------------------------------------------------------------------------------------------------------------------------------------------------------------------------------------------------------------------------------------------------------------------------------------------------------------------------------------------------------------------------------------------------------------------------------------------------------------------------------|
| Journal:                      | <i>BMJ Open</i>                                                                                                                                                                                                                                                                                                                                                                                                                                                                                                                                                                                                                                                                                                                                                                                                                           |
| Manuscript ID                 | bmjopen-2018-022403                                                                                                                                                                                                                                                                                                                                                                                                                                                                                                                                                                                                                                                                                                                                                                                                                       |
| Article Type:                 | Research                                                                                                                                                                                                                                                                                                                                                                                                                                                                                                                                                                                                                                                                                                                                                                                                                                  |
| Date Submitted by the Author: | 19-Feb-2018                                                                                                                                                                                                                                                                                                                                                                                                                                                                                                                                                                                                                                                                                                                                                                                                                               |
| Complete List of Authors:     | Bjorvatn, Bjørn; Universitetet i Bergen Det medisinsk-odontologiske fakultet, Department of Global Public Health and Primary Care; Haukeland Universitetssjukehus, Norwegian Competence Center for Sleep Disorders<br>Pallesen, Ståle; Universitetet i Bergen, Department of Psychosocial Science, Bergen, Norway; Haukeland Universitetssjukehus, Norwegian Competence Center for Sleep Disorders<br>Moen, Bente; Universitetet i Bergen Det medisinsk-odontologiske fakultet, Department of Global Public Health and Primary Care<br>Waage, Siri; Universitetet i Bergen Det medisinsk-odontologiske fakultet, Department of Global Public Health and Primary Care; Haukeland Universitetssjukehus, Norwegian Competence Center for Sleep Disorders<br>Kristoffersen, Espen Saxhaug; University of Oslo, Department of General Practice |
| Keywords:                     | chronic headache, insomnia, shift work disorder, night work, quick returns                                                                                                                                                                                                                                                                                                                                                                                                                                                                                                                                                                                                                                                                                                                                                                |
|                               |                                                                                                                                                                                                                                                                                                                                                                                                                                                                                                                                                                                                                                                                                                                                                                                                                                           |

SCHOLARONE™  
Manuscripts

Only

1  
2  
3 **Migraine, tension-type headache and medication-overuse headache in a**  
4 **large population of shift working nurses – a cross-sectional study**  
5  
6  
7

8 Bjørn Bjorvatn MD PhD<sup>1,2</sup>, Ståle Pallesen PhD<sup>2,3</sup>, Bente E. Moen MD PhD<sup>1</sup>, Siri Waage  
9 PhD<sup>1,2</sup>, Espen S. Kristoffersen MD PhD<sup>4</sup>  
10  
11

12  
13 <sup>1</sup> Department of Global Public Health and Primary Care, University of Bergen, Norway.

14 <sup>2</sup> Norwegian Competence Center for Sleep Disorders, Haukeland University Hospital,  
15 Norway.  
16

17 <sup>3</sup> Department of Psychosocial Science, University of Bergen, Norway.  
18

19 <sup>4</sup> Department of General Practice, University of Oslo, Norway.  
20  
21  
22  
23

24 Corresponding author:

25 Bjørn Bjorvatn

26 Department of Global Public Health and Primary Care

27 University of Bergen

28 Kalfarveien 31, N-5018 Bergen

29 Norway

30 Phone: +4755586088

31 Fax: +4755586130

32 Email: [bjorn.bjorvatn@uib.no](mailto:bjorn.bjorvatn@uib.no)  
33  
34  
35  
36  
37  
38  
39  
40  
41  
42  
43  
44  
45  
46  
47  
48  
49  
50  
51  
52  
53  
54  
55  
56  
57  
58  
59  
60

### Key messages

What is already known about this subject?

- Shift work is associated with poor sleep, and poor sleep may trigger headache.  
However, whether there is an association between shift work and headache is unclear.

What are the new findings?

- Tension-type headache was associated with high number of night shifts, but neither migraine, tension-type headache, nor medication-overuse headache were associated with work schedule. Several types of headaches were however associated with insomnia disorder and shift work disorder.

How might it impact on clinical practice in the foreseeable future?

- As no clear association was found between different types of headache and shift work schedules, headache may not be a major concern for the majority of shift workers.

## ABSTRACT

### Objectives

To investigate associations between different types of headache and shift work.

### Methods

1585 nurses with different work schedules (day work, two-shift rotation, night work, three-shift rotation) participated in a cohort study with annual surveys that started in 2008/2009. A comprehensive headache instrument was included in wave 6. Headaches were assessed according to the International Classification of Headache Disorders IIIb. Frequent headache ( $\geq 1$  day per month), migraine, tension-type headache (TTH), chronic headache (headache  $> 14$  days per month), and medication-overuse headache (MOH, chronic headache + acute headache medication  $\geq 10$  days last month) comprised the dependent variables. Adjusted (for sex, age, percentage of full-time equivalent, marital status, children living at home) logistic regression analyses were conducted with work schedule, number of night shifts worked last year, number of quick returns ( $< 11$  hours in-between shifts) last year, shift work disorder (SWD), and insomnia disorder as predictors.

### Results

Frequent headache, migraine, and chronic headache were associated with SWD (ORs 1.60 to 2.45) and insomnia disorder (ORs 1.55 to 3.03), but not with work schedule, number of night shifts or number of quick returns. TTH was only associated with  $> 20$  night shifts last year (OR 1.41). MOH was only associated with insomnia disorder (OR 7.62).

### Conclusions

We found no association between different types of headache and work schedule. However, TTH was associated with high number of night shifts. Nurses with insomnia disorder and SWD reported higher prevalence of frequent headache, migraine, chronic headache and MOH (only insomnia) compared to nurses not having insomnia disorder and SWD, respectively.

**Keywords:** chronic headache, insomnia, shift work disorder, night work, quick returns

### Strengths and limitations of this study

- A large and homogeneous sample of nurses with different work schedules
- Validated questionnaires for diagnosing different types of headache and sleep disorders

- No clinical interviews by physicians
- Few nurses with some of the headache subtypes which limits statistical power in these analyses
- No conclusions about causality due to the cross-sectional design

For peer review only

## INTRODUCTION

Shift work is associated with impaired health, and several studies show that working shifts increase the risk of sleep disturbances, cardiovascular disease, metabolic disorders, and cancer.<sup>1</sup> Sleep disturbances are considered to be the most common complaints, especially among rotating shift workers and night workers.<sup>2,3</sup> Night workers are on duty during their biological resting phase and are enforced to schedule sleep to their biological active phase. This has been proposed as a causative factor for sleep and health problems.<sup>1</sup> Accordingly, studies suggest that the number of night shifts per year and the number of quick returns (defined as shifts with less than 11 hours in-between) per year are associated with increased risk of health complaints and sick leave.<sup>4-6</sup>

Recently, the focus on shift workers fulfilling the criteria for shift work disorder (SWD) has been intensified.<sup>7-9</sup> SWD is characterized by complaints of sleep problems and excessive sleepiness caused by work schedules overlapping with the habitual time for sleep.<sup>7,10</sup> This disorder affects 4.8-44.3% of nurses depending on type of work schedule.<sup>11</sup> SWD has been associated with impaired health, e.g. depression and hypertension.<sup>7,9,11,12</sup>

Few studies have specifically investigated the association between shift work and the presence and severity of headache. This is somewhat surprising, considering the association between sleep and headache.<sup>13-15</sup> One study from China reported that greater number of night shifts is positively associated with prevalence of headache,<sup>16</sup> and another study from Taiwan suggested that shift work increases the risk of migraine.<sup>17</sup> A Scandinavian study found an association between evening work, but not night work, and migraine.<sup>15</sup> The relationship between sleep and headache seems to be bidirectional. Lack of sleep can trigger headache, but sleep may also alleviate headache.<sup>14</sup> Disturbed sleep due to shift work is therefore likely to increase the risk of headache. The most common primary headaches in the general population are migraine and tension-type headache.<sup>18</sup> Most studies have focused on migraine and shift work,<sup>14,15</sup> although tension-type headache (TTH) is considered the most common form of headache with an estimated worldwide prevalence of approximately 40%.<sup>18</sup> The prevalence of migraine in the general population is 10-16%.<sup>18,19</sup> Chronic headache is defined as headache occurring more than 14 days per month and is present in 2-4% of the general population.<sup>18-21</sup> Medication-overuse headache (MOH) is a condition characterized by chronic headache and overuse of acute headache medications, usually defined as intake of acute pain or migraine

1  
2  
3 medications 10 or more days per month.<sup>20 22</sup> The prevalence of medication-overuse headache  
4 in the general population is 1-2%, with more females being afflicted than males.<sup>22 23</sup>  
5  
6

7  
8 As headache is common in the general population and since sleep loss, that often occurs  
9 concomitant with shift work, may trigger headache, we aimed to investigate whether different  
10 types of headache (i.e. migraine, TTH, chronic headache, MOH) were related to work  
11 schedules, number of night shifts, number of quick returns, SWD, and insomnia disorder,  
12 after adjusting for relevant confounders. Nurses comprise a large population of shift workers  
13 and are thereby suitable for such studies. We hypothesized that nurses involved in night and  
14 shift work would report a higher prevalence of headaches compared to day workers.  
15  
16  
17  
18  
19  
20  
21

## 22 **METHODS**

### 23 **Procedure and participants**

24  
25 The data stemmed from the ongoing longitudinal cohort study “SURvey of Shift work, Sleep  
26 and Health (SUSSH)” among Norwegian nurses. The first data collection was conducted  
27 during winter 2008/2009 (wave 1) when a sample of 5400 nurses was randomly selected from  
28 the Norwegian Nurses Organisation’s (NNO) membership roll and invited to participate. A  
29 total of 2059 (response rate = 38.1%) nurses completed the questionnaire at the first wave. In  
30 order to increase the study population, an additional sample of 906 newly educated nurses  
31 (response rate = 33.1%) was recruited in 2009. The total sample in wave 1 therefore included  
32 2965 nurses, see details in Bjorvatn et al.<sup>24</sup> The nurses who responded to the first wave have  
33 been invited to participate in annual follow-ups by receiving questionnaires sent by postal  
34 mail with pre-paid envelopes for returning the completed forms. Up to two reminders were  
35 sent to nurses who did not respond. The nurses who returned the questionnaire took part in a  
36 lottery, in which 25 individuals won a gift card with a value of 500 NOK (~ 60 US \$). The  
37 present study reports findings based on data from the sixth (2014) wave, in which the  
38 headache questionnaire was included. A total of 1991 out of 2869 eligible nurses completed  
39 the questionnaire at wave 6, yielding a response rate of 69.4%. Nurses that reported that they  
40 were no longer working as nurses at wave 6 were excluded from the analyses, leaving a total  
41 study population of 1585 nurses.  
42  
43  
44  
45  
46  
47  
48  
49  
50  
51  
52  
53

### 54 **Demographics**



1  
2  
3 The demographic variables were assessed in wave 6, except for age and sex that were  
4 registered in wave 1. The nurses responded to questions about marital status  
5 (married/cohabiting; yes/no), children living at home (yes/no), percentage of full-time  
6 equivalent (<50%, 50-75%, 76-90%, >90% position), work schedule (day only, evening only,  
7 two-shift rotation (day and evening), night only, three-shift rotation (day, evening and night),  
8 and other schedules including night work), number of night shifts worked last year, and  
9 number of quick returns (defined as less than 11 hours between consecutive work shifts)  
10 worked last year. Few nurses worked “evening only” (n=6) and “other schedules including  
11 night shifts” (n=67), and these shifts were therefore excluded in the analysis of the association  
12 between work schedule and headache.  
13  
14  
15  
16  
17  
18  
19

## 20 Headache

21  
22 The comprehensive headache questionnaire was designed to determine whether the nurses  
23 suffered from headache, and fulfilled the International Classification of Headache Disorders  
24 (ICHD) IIIb criteria for migraine, tension-type headache (TTH) and medication-overuse  
25 headache (MOH).<sup>20</sup> The nurses were first screened: “Have you suffered from headache during  
26 the last year?”, and only nurses who answered “yes” were asked to respond to the other  
27 headache items. The screening positive headache sufferers were asked to report frequency,  
28 attack duration, intensity and accompanying headache symptoms to classify migraine and  
29 TTH, accordingly. The diagnoses of migraine and TTH were mutually exclusive. Frequent  
30 headache was defined as headache  $\geq 1$  day per month, and chronic headache was defined as  
31 headache  $>14$  days per month. MOH was defined as chronic headache and intake of acute  
32 headache medication  $\geq 10$  days last month. The questionnaire-based headache diagnoses used  
33 here have previously been validated in a large unselected general population sample.<sup>19 25 26</sup>  
34  
35  
36  
37  
38  
39  
40  
41  
42

## 43 Shift work disorder (SWD)

44  
45 SWD was measured with three previous used questions<sup>10 11</sup> based on the minimal criteria  
46 listed in the second edition of the International Classification of Sleep Disorders (ICSD-2).<sup>27</sup>  
47 The questions were: a) Do you experience either difficulties sleeping or experience excessive  
48 sleepiness? (yes/no), b) Is the sleep or sleepiness problem related to a work schedule that  
49 makes you work when you normally would sleep? (yes/no), c) Have you had this sleep or  
50 sleepiness problem related to the work schedule for at least one month? (yes/no). Participants  
51 were classified as having SWD if they endorsed all three questions.  
52  
53  
54  
55  
56  
57  
58  
59  
60

### Insomnia disorder

Insomnia symptoms were evaluated with Bergen Insomnia Scale (BIS).<sup>28</sup> The BIS consists of six items, and was developed based on the diagnostic criteria for insomnia according to 4<sup>th</sup> and text revision version of the Diagnostic and Statistical Manual for Mental Disorders (DSM-IV-TR).<sup>29</sup> The items are scored along an eight-point scale indicating the number of days per week for which a specific insomnia symptom is experienced (0-7 days). The items refer to sleep onset (sleep latency exceeding 30 minutes), wake after sleep onset (more than 30 minutes), early morning awakening (more than 30 minutes), non-restorative sleep, daytime impairment, and dissatisfaction with sleep. The time frame is insomnia symptoms experienced during the past month. According to DSM-5 criteria,<sup>30</sup> insomnia disorder is defined as scoring 3 days per week or more on at least one of the first three items as well as 3 days per week or more on at least one of the latter two items. Missing responses to any of the insomnia questions were treated as not reporting that specific insomnia symptom. The scale has acceptable test-retest reliability, and good convergent and discriminative validity in relation to other self-report measures as well as to polysomnographic data.<sup>28</sup> Cronbach's alpha for the BIS was 0.83 in the present sample.

### Ethics

The study was approved by the Regional Committee for Medical and Health Research Ethics of Western Norway (REK-West, no 088.08). Written informed consent was obtained from all participants.

### Statistics

The statistical analyses were conducted with IBM SPSS Statistics 23 for Windows. The prevalence of frequent headache, migraine, TTH, chronic headache, and MOH in relation to the different work schedules, categories of night shifts and quick returns last year, SWD and insomnia disorder were explored by the Pearson chi-square tests (with Yates' correction for continuity when used in a 2 x 2 table). In addition, separate adjusted (with sex, age, percentage of full-time equivalent, marital status, children living at home as co-variables) logistic regression analyses were performed to assess different headaches (frequent headache, migraine, TTH, chronic headache, MOH) as dependent variables with work schedule (day only as a reference, compared to two-shift rotation, night only and three-shift rotation), number of night shifts last year (0, 1-20, >20 night shifts), number of quick returns last year

(0, 1-20, >20 quick returns), SWD, and insomnia disorder as predictors. Significance level was set to .05.

## RESULTS

Demographic characteristics are presented in Table 1. Most of the nurses were females (90.5%) and mean age in wave 1 was 32.5 years (SD=8.5). Three-shift and two-shift rotation were the most common work schedules (Table 1). Mean number of night shifts last year was 23.5 (SD=36.7) and mean number of quick returns last year was 33.4 (SD=35.4). Shift work disorder and insomnia disorder were present in 27.3% and 31.7% of the nurses, respectively. In total, 56.0% of the nurses (n=885) reported headache complaints during the last year, and 48.1% (n=763) frequent headache ( $\geq 1$  day per month). Migraine, TTH, chronic headache, and MOH were present in 19.6% (n=302), 27.9 (n=435), 2.3% (n=37), and 1.2% (n=19) of the total sample of nurses, respectively (Table 1).

We did not find any significant differences between the prevalence of frequent headache, migraine, TTH, chronic headache or MOH across work schedules (Table 2). Similarly, logistic regression analyses with adjustment for sex, age, percentage of full-time equivalent, marital status, and children living at home, revealed no association between the different headache types and work schedule (Table 3).

The prevalence of TTH was higher in nurses working night shifts last year compared to those not working night shifts, but we found no association between frequent headache, migraine, chronic headache or MOH and number of night shifts last year (Table 2). Similarly, in the adjusted logistic regression analysis, TTH was significantly associated with >20 night shifts last year (OR=1.41) (Table 3). There were no associations between the different headache types and number of quick returns last year (Tables 2 and 3).

The prevalence of frequent headache, migraine, and chronic headache were all clearly higher among nurses with SWD compared to nurses without SWD (Table 2). Furthermore, adjusted logistic regression analyses revealed that frequent headache, migraine, and chronic headache all were significantly associated with SWD, with odd ratios ranging from 1.60 to 2.45 (Table 3). TTH and MOH were not significantly associated with SWD (Tables 2 and 3).

1  
2  
3 The prevalence of frequent headache, migraine, chronic headache, and MOH were all clearly  
4 higher among nurses with insomnia disorder compared to nurses without insomnia disorder  
5 (Table 2). These findings were also present in the adjusted logistic regression analyses, with  
6 odds ratios ranging from 1.55 to 7.62 (Table 3). The only headache type that was not  
7 associated with insomnia disorder was TTH (Tables 2 and 3).  
8  
9

## 10 11 12 13 14 **DISCUSSION**

15 The present study showed that nurses with different work schedules reported similar  
16 prevalence of frequent headache, migraine, TTH, chronic headache, and MOH. These  
17 findings did thus not support our hypothesis that shift working nurses would report higher  
18 prevalence of headaches than day workers. However, nurses with high number of night shifts  
19 during the last year reported higher prevalence of TTH than nurses with no night shifts.  
20 Furthermore, nurses with SWD and insomnia disorder reported higher prevalence of most  
21 types of headache compared to nurses without SWD and insomnia disorder, respectively.  
22  
23

24 We hypothesized that night and shift work would be associated with higher prevalence of  
25 headaches. This was based on the well-known association between lack of sleep and  
26 headache.<sup>14 31</sup> It is well known that both rotating shift work schedules and night work  
27 normally will cause circadian rhythm misalignment and sleep deprivation.<sup>8 32 33</sup> In line with  
28 this, a Chinese study showed that number of night shifts was positively associated with  
29 prevalence of different types of headache.<sup>16</sup> However, a recent Danish study did not find any  
30 association between treatment-seeking migraine and night work or variable working hours.<sup>15</sup>  
31 In the latter study, only fixed evening work was found to be associated (positively) with  
32 migraine. One possible explanation for the lack of association between headaches and work  
33 schedules in the present study may be the “healthy shift worker effect”. This is based on the  
34 assumption that shift workers have better health than those who avoid or quit shift work.<sup>34</sup>  
35 Hence, nurses with headaches may be more reluctant to work shifts or quit shift work more  
36 frequently than others, leading to underestimates of the possible negative effects of shift work  
37 in studies like the present one.  
38  
39  
40  
41  
42  
43  
44  
45  
46  
47  
48  
49  
50

51  
52  
53 Similarly, the number of night shifts worked the last year was not associated with frequent  
54 headache, migraine, chronic headache, or MOH. However, TTH was associated with high  
55 number of night shifts. This finding suggests that there may be different sleep-headache  
56  
57

1  
2  
3 mechanisms in TTH than in e.g. migraine.<sup>35</sup> In line with this, a polysomnography study found  
4 that TTH patients need more sleep than healthy controls, and that inadequate sleep may  
5 contribute to increased pain sensitivity in TTH.<sup>36</sup> Furthermore, a high number of night shifts  
6 may not necessarily only cause sleep deprivation, but may also be experienced as stressful and  
7 thereby precipitate TTH. High work stress is a risk factor for primary headaches, especially  
8 tension-type headache.<sup>16 37</sup> Whether circadian misalignment in itself (often occurring among  
9 shift and night workers) triggers headaches is not known, and this topic should receive more  
10 attention in the future.  
11  
12  
13  
14  
15

16  
17 Many Norwegian nurses with rotating shift schedules have quick returns (defined as shifts  
18 separated by less than 11 hours) in their roster. For the nurses, most quick returns involve  
19 working an evening shift followed by a day shift. Such short rest in-between shifts typically  
20 cause sleep deprivation and health problems.<sup>4 5</sup> However, we found no association between  
21 headaches and quick returns. This suggests that short-term sleep deprivation, as seen with  
22 quick returns, may not pose a major problem in relation to headache risk. This was found  
23 even though a high percentage of the nurses reported frequent quick returns.  
24  
25  
26  
27  
28  
29

30 In the present study, frequent headache, migraine, and chronic headache were all associated  
31 with SWD. These novel findings suggest that nurses who do not cope well with shift work are  
32 at increased risk of other health complaints like headaches. However, our study cannot say  
33 anything about cause-and-effect. That is, it may be that headache increases the risk of SWD.  
34 Future studies should consequently focus on whether there may be common vulnerability  
35 factors (e.g. genetic, health behaviour, etc.) between headaches and sleep related disorders.  
36 Interestingly, TTH was not associated with SWD, suggesting that different pathophysiological  
37 mechanisms may be involved across the different types of headaches.  
38  
39  
40  
41  
42  
43  
44

45 Insomnia disorder was associated with all headache types, except TTH, which is in line with  
46 the findings from several other studies.<sup>14 38 39</sup> However, few studies have used formal  
47 diagnostic criteria for insomnia disorder, like the present study. Thus, one major asset with the  
48 present study was the use of ICSD and ICHD criteria for sleep disorders and headache  
49 classification, respectively. Surprisingly, TTH was not associated with insomnia disorder in  
50 our study, in contrast to two other population-based studies.<sup>31 40</sup> However, none of those  
51 studies used the formal diagnostic criteria for insomnia disorder. MOH was significantly  
52 associated with insomnia disorder, but not with any of the work-related variables. In fact, our  
53  
54  
55  
56  
57  
58  
59  
60

1  
2  
3 data indicate that nurses with insomnia disorder had more than 7 times higher risk of MOH  
4 than those without insomnia disorder. This strong association warrants further studies.  
5  
6

### 7 8 **Strengths and limitations**

9 The present study was based on a large and homogeneous sample of nurses that limits the  
10 influence from possible confounding variables. Other strengths were the use of validated  
11 headache diagnoses and a validated insomnia scale as well as criteria-based SWD diagnostics.  
12 Furthermore, the study did not have a primary focus on headache, it was one of many health  
13 outcomes. Thus, a possible selection bias related to headache was unlikely. In terms of  
14 limitations, it should be noted that the response rate in the first wave was low, which may  
15 make the interpretation of the data and conclusions less generalizable. Still, the response rate  
16 in wave 6 where the headache questionnaire was included was high. Due to the high number  
17 of participants in our survey, it was not feasible to apply the gold standard, i.e. a clinical  
18 interview by a physician experienced in headache and sleep diagnostics. For the same reason,  
19 prospective headache and sleep diaries were not feasible. However, the questionnaire-based  
20 headache diagnostic procedures have been included in several previous large population-  
21 based studies and have been validated against clinical interviews with a high degree of  
22 agreement.<sup>19 25 26</sup> The prevalence of the different headaches reported in the present study were  
23 similar to those reported previously,<sup>16 18 19 21 23</sup> strengthening the assumption of  
24 representativeness of the study population. The number of participants with chronic headache  
25 and MOH were low, limiting the statistical power in these analyses. Finally, it should be  
26 noted that the cross-sectional design does not permit any conclusions about causality in the  
27 relationship between headaches and work variables.  
28  
29  
30  
31  
32  
33  
34  
35  
36  
37  
38  
39  
40

### 41 42 **Conclusion**

43 We found no association between different types of headache and work schedule or quick  
44 returns. TTH was however associated with high number of night shifts, but not any of the  
45 other work variables. Nurses with SWD reported higher prevalence of frequent headache,  
46 migraine, and chronic headache compared to nurses not having SWD. Similarly, nurses with  
47 insomnia disorder, compared to those without, reported higher prevalence of all types of  
48 headache, except TTH. Further research should be longitudinal in order to study  
49 causality/directionality between headaches and work variables.  
50  
51  
52  
53  
54  
55  
56  
57  
58  
59  
60

### **Funding**

The study received a grant for practical administration and data collection from The Western Norway Regional Health Authority (grant number 911386, no personal payment/salary). The Norwegian Nurses Organization has provided grants to cover some of the the running expenses of the SUSSH study. The study was further partly funded from Nordforsk, Nordic Program on Health and Welfare (74809).

### **Competing interests statement**

None declared.

### **Data sharing**

No additional data available.

### **Contributorship statement**

BB: contributed to the design of the study, data collection, data analysis, drafted the paper, and approved the final version.

SP: contributed to the design of the study, data collection, data analysis, revised the paper, and approved the final version.

BEM: contributed to the design of the study, data collection, data analysis, revised the paper, and approved the final version.

SW: contributed to the design of the study, data collection, data analysis, revised the paper, and approved the final version.

ESK: contributed to the design of the study, data analysis, revised the paper, and approved the final version.

### **References**

- 1 Kecklund G, Axelsson J. Health consequences of shift work and insufficient sleep. *BMJ* 2016;355:i5210.
- 2 Akerstedt T. Shift work and disturbed sleep/wakefulness. *Occup Med (Lond)* 2003;53:89-94.



- 1  
2  
3 Oyane NM, Pallesen S, Moen BE, Akerstedt T, Bjorvatn B. Associations between  
4 night work and anxiety, depression, insomnia, sleepiness and fatigue in a sample of  
5 Norwegian nurses. *PLoS ONE* 2013;8:e70228.
- 6  
7  
8 Eldevik MF, Flo E, Moen BE, Pallesen S, Bjorvatn B. Insomnia, excessive sleepiness,  
9 excessive fatigue, anxiety, depression and shift work disorder in nurses having less  
10 than 11 hours in-between shifts. *PLoS ONE* 2013;8:e70882.
- 11  
12  
13 Vedaa O, Pallesen S, Waage S et al. Short rest between shift intervals increases the  
14 risk of sick leave: a prospective registry study. *Occup Environ Med* 2017;74:496-501.
- 15  
16  
17 Flo E, Pallesen S, Moen BE, Waage S, Bjorvatn B. Short rest periods between work  
18 shifts predict sleep and health problems in nurses at 1-year follow-up. *Occup Environ*  
19 *Med* 2014;71:555-61.
- 20  
21  
22 Di Milia L, Waage S, Pallesen S, Bjorvatn B. Shift work disorder in a random  
23 population sample--prevalence and comorbidities. *PLoS ONE* 2013;8:e55306.
- 24  
25  
26 Wright KP, Jr., Bogan RK, Wyatt JK. Shift work and the assessment and management  
27 of shift work disorder (SWD). *Sleep Med Rev* 2013;17:41-54.
- 28  
29  
30 Waage S, Pallesen S, Moen BE et al. Predictors of shift work disorder among nurses: a  
31 longitudinal study. *Sleep Med* 2014;15:1449-55.
- 32  
33  
34 Waage S, Moen BE, Pallesen S et al. Shift work disorder among oil rig workers in the  
35 North Sea. *Sleep* 2009;32:558-65.
- 36  
37  
38 Flo E, Pallesen S, Mageroy N et al. Shift work disorder in nurses--assessment,  
39 prevalence and related health problems. *PLoS ONE* 2012;7:e33981.
- 40  
41  
42 Drake CL, Roehrs T, Richardson G, Walsh JK, Roth T. Shift work sleep disorder:  
43 prevalence and consequences beyond that of symptomatic day workers. *Sleep*  
44 2004;27:1453-62.
- 45  
46  
47 Houle TT, Butschek RA, Turner DP, Smitherman TA, Rains JC, Penzien DB. Stress  
48 and sleep duration predict headache severity in chronic headache sufferers. *Pain*  
49 2012;153:2432-40.
- 50  
51  
52 Kim J, Cho SJ, Kim WJ, Yang KI, Yun CH, Chu MK. Insufficient sleep is prevalent  
53 among migraineurs: a population-based study. *J Headache Pain* 2017;18:50.
- 54  
55  
56 Jakobsen GS, Timm AM, Hansen AM, Garde AH, Nabe-Nielsen K. The association  
57 between shift work and treatment-seeking migraine in Denmark. *Ergonomics*  
58 2017;60:1207-1217.
- 59  
60  
61 Wang Y, Xie J, Yang F et al. The prevalence of primary headache disorders and their  
62 associated factors among nursing staff in North China. *J Headache Pain* 2015;16:4.



- 1  
2  
3 17 Kuo WY, Huang CC, Weng SF et al. Higher migraine risk in healthcare professionals  
4 than in general population: a nationwide population-based cohort study in Taiwan. *J*  
5 *Headache Pain* 2015;16:102.  
6  
7 18 Jensen R, Stovner LJ. Epidemiology and comorbidity of headache. *Lancet Neurol*  
8 2008;7:354-61.  
9  
10 19 Linde M, Stovner LJ, Zwart JA, Hagen K. Time trends in the prevalence of headache  
11 disorders. The Nord-Trondelag Health Studies (HUNT 2 and HUNT 3). *Cephalalgia*  
12 2011;31:585-96.  
13  
14 20 Headache Classification Committee of the International Headache Society. The  
15 International Classification of Headache Disorders, 3rd edition (beta version).  
16 *Cephalalgia* 2013;33:629-808.  
17  
18 21 Grande RB, Aaseth K, Gulbrandsen P, Lundqvist C, Russell MB. Prevalence of  
19 primary chronic headache in a population-based sample of 30- to 44-year-old persons.  
20 The Akershus study of chronic headache. *Neuroepidemiology* 2008;30:76-83.  
21  
22 22 Diener HC, Holle D, Solbach K, Gaul C. Medication-overuse headache: risk factors,  
23 pathophysiology and management. *Nat Rev Neurol* 2016;12:575-83.  
24  
25 23 Jonsson P, Hedenrud T, Linde M. Epidemiology of medication overuse headache in  
26 the general Swedish population. *Cephalalgia* 2011;31:1015-22.  
27  
28 24 Bjorvatn B, Mageroy N, Moen BE, Pallesen S, Waage S. Parasomnias are more  
29 frequent in shift workers than in day workers. *Chronobiol Int* 2015;32:1352-8.  
30  
31 25 Hagen K, Zwart JA, Aamodt AH et al. The validity of questionnaire-based diagnoses:  
32 the third Nord-Trondelag Health Study 2006-2008. *J Headache Pain* 2010;11:67-73.  
33  
34 26 Hagen K, Zwart JA, Aamodt AH et al. A face-to-face interview of participants in  
35 HUNT 3: the impact of the screening question on headache prevalence. *J Headache*  
36 *Pain* 2008;9:289-94.  
37  
38 27 American Academy of Sleep Medicine. *The international classification of sleep*  
39 *disorders, 2nd ed.: Diagnostic and coding manual*. Westchester, IL, 2005.  
40  
41 28 Pallesen S, Bjorvatn B, Nordhus IH, Sivertsen B, Hjørnevik M, Morin CM. A new  
42 scale for measuring insomnia: the Bergen Insomnia Scale. *Perceptual and Motor*  
43 *Skills* 2008;107:691-706.  
44  
45 29 American Psychiatric Association. *Diagnostic and statistical manual of mental*  
46 *disorders. Text revision (DSM-IV-TR)*. Washington, DC: American Psychiatric  
47 Association, 2000.  
48  
49  
50  
51  
52  
53  
54  
55  
56  
57  
58  
59  
60

- 1  
2  
3 30 American Psychiatric Association. *Diagnostic and Statistical Manual of Mental*  
4 *Disorders (DSM-5)*. Washington, DC: American Psychiatric Association, 2013.  
5  
6 31 Odegard SS, Engstrom M, Sand T, Stovner LJ, Zwart JA, Hagen K. Associations  
7 between sleep disturbance and primary headaches: the third Nord-Trondelag Health  
8 Study. *J Headache Pain* 2010;11:197-206.  
9  
10 32 Bjorvatn B, Pallesen S. A practical approach to circadian rhythm sleep disorders.  
11 *Sleep Med Rev* 2009;13:47-60.  
12  
13 33 Sack RL, Auckley D, Auger RR et al. Circadian rhythm sleep disorders: part I, basic  
14 principles, shift work and jet lag disorders. An American Academy of Sleep Medicine  
15 review. *Sleep* 2007;30:1460-83.  
16  
17 34 Knutsson A. Methodological aspects of shift-work research. *Chronobiol Int*  
18 2004;21:1037-47.  
19  
20 35 Rains JC, Davis RE, Smitherman TA. Tension-type headache and sleep. *Curr Neurol*  
21 *Neurosci Rep* 2015;15:520.  
22  
23 36 Engstrom M, Hagen K, Bjork M, Stovner LJ, Stjern M, Sand T. Sleep quality, arousal  
24 and pain thresholds in tension-type headache: a blinded controlled polysomnographic  
25 study. *Cephalalgia* 2014;34:455-63.  
26  
27 37 Bendtsen L, Jensen R. Treating tension-type headache -- an expert opinion. *Expert*  
28 *Opin Pharmacother* 2011;12:1099-109.  
29  
30 38 Tran DP, Spierings EL. Headache and insomnia: their relation reviewed. *Cranio*  
31 2013;31:165-70.  
32  
33 39 Uhlig BL, Engstrom M, Odegard SS, Hagen KK, Sand T. Headache and insomnia in  
34 population-based epidemiological studies. *Cephalalgia* 2014;34:745-51.  
35  
36 40 Rasmussen BK. Migraine and tension-type headache in a general population:  
37 precipitating factors, female hormones, sleep pattern and relation to lifestyle. *Pain*  
38 1993;53:65-72.  
39  
40  
41  
42  
43  
44  
45  
46  
47  
48  
49  
50  
51  
52  
53  
54  
55  
56  
57  
58  
59  
60

Table 1. Characteristics of the Norwegian nurses in the study.

|                                                           |                  |
|-----------------------------------------------------------|------------------|
| Sex (n=1578): Female                                      | 90.5%            |
| Age in wave 1 (n=1583): mean (SD)                         | 32.5 (8.5) years |
| Percentage of full-time equivalent (n=1536):              |                  |
| <50%                                                      | 3.9%             |
| 50-75%                                                    | 20.3%            |
| 76-90%                                                    | 16.5%            |
| >90%                                                      | 59.2%            |
| Married/cohabiting (n=1582): Yes                          | 76.5%            |
| Children living at home (n=1578): Yes                     | 63.3%            |
| Work schedule (n=1532):                                   |                  |
| Day only                                                  | 19.3%            |
| Evening only                                              | 0.4              |
| Two-shift rotation                                        | 32.4%            |
| Night shift only                                          | 6.6%             |
| Three-shift rotation                                      | 36.9%            |
| Other schedules including night shifts                    | 4.4%             |
| Number of night shifts last year (n=1534):                |                  |
| 0 night shifts                                            | 39.8%            |
| 1-20 night shifts                                         | 26.1%            |
| >20 night shifts                                          | 34.0%            |
| Number of quick returns last year (n=1511):               |                  |
| 0 quick returns                                           | 22.6%            |
| 1-20 quick returns                                        | 25.2%            |
| >20 quick returns                                         | 52.2%            |
| Shift work disorder (n=1567): Yes                         | 27.3%            |
| Insomnia disorder (n=1585): Yes                           | 31.7%            |
| Headache last year (n=1579): Yes                          | 56.0%            |
| Frequent headache ( $\geq 1$ day per month) (n=1585): Yes | 48.1%            |
| Migraine (n=1537): Yes                                    | 19.6%            |
| Tension-type headache (n=1559): Yes                       | 27.9%            |
| Chronic headache (n=1577): Yes                            | 2.3%             |
| Medication-overuse headache (n=1579): Yes                 | 1.2%             |

SD, standard deviation. n, number of nurses.

Table 2. Prevalence of different types of headache complaints among Norwegian nurses.

|                                        | Frequent headache <sup>1</sup><br>% (n) | Migraine<br>% (n)               | Tension-type<br>headache % (n) | Chronic headache <sup>2</sup><br>% (n) | Medication-overuse<br>headache % (n) |
|----------------------------------------|-----------------------------------------|---------------------------------|--------------------------------|----------------------------------------|--------------------------------------|
| Work schedule (n=1415-1459):           | 0.2 <sup>a</sup> , p=.979               | 2.5 <sup>a</sup> , p=.472       | 3.5 <sup>a</sup> , p=.321      | 2.3 <sup>a</sup> , p=.510              | 1.7 <sup>a</sup> , p=.637            |
| Day only                               | 47.3 (140)                              | 22.6 (65)                       | 24.5 (71)                      | 1.7 (5)                                | 1.0 (3)                              |
| Two-shift rotation                     | 48.7 (242)                              | 20.3 (98)                       | 26.1 (129)                     | 3.2 (16)                               | 1.6 (8)                              |
| Night shift only                       | 47.5 (48)                               | 16.3 (16)                       | 29.0 (29)                      | 2.0 (2)                                | 2.0 (2)                              |
| Three-shift rotation                   | 47.6 (269)                              | 18.8 (103)                      | 29.9 (165)                     | 2.1 (12)                               | 0.9 (5)                              |
| Night shifts last year (n=1489-1534):  | 3.4 <sup>a</sup> , p=.180               | 3.3 <sup>a</sup> , p=.188       | <b>6.9<sup>a</sup>, p=.032</b> | 0.4 <sup>a</sup> , p=.813              | 1.1 <sup>a</sup> , p=.578            |
| 0 night shifts                         | 47.8 (292)                              | 21.9 (130)                      | 24.4 (147)                     | 2.6 (16)                               | 1.5 (9)                              |
| 1-20 night shifts                      | 44.6 (179)                              | 18.0 (70)                       | 30.0 (118)                     | 2.0 (8)                                | 0.8 (3)                              |
| >20 night shifts                       | 50.8 (265)                              | 18.1 (92)                       | 30.9 (159)                     | 2.3 (12)                               | 1.2 (6)                              |
| Quick returns last year (n=1465-1511): | 0.2 <sup>a</sup> , p=.902               | 1.5 <sup>a</sup> , p=.480       | 2.4 <sup>a</sup> , p=.296      | 0.2 <sup>a</sup> , p=.885              | 0.8 <sup>a</sup> , p=.666            |
| 0 quick returns                        | 47.4 (162)                              | 22.1 (73)                       | 24.8 (83)                      | 2.1 (7)                                | 1.2 (4)                              |
| 1-20 quick returns                     | 48.8 (186)                              | 18.9 (70)                       | 29.6 (111)                     | 2.4 (9)                                | 0.8 (3)                              |
| >20 quick returns                      | 48.7 (384)                              | 19.1 (146)                      | 28.8 (224)                     | 2.5 (20)                               | 1.4 (11)                             |
| Shift work disorder (n=1521-1567):     | <b>36.9<sup>a</sup>, p&lt;.0005</b>     | <b>11.3<sup>a</sup>, p=.001</b> | 1.6 <sup>a</sup> , p=.208      | <b>5.7<sup>a</sup>, p=.017</b>         | 0.5 <sup>a</sup> , p=.491            |
| No                                     | 43.4 (494)                              | 17.7 (197)                      | 26.9 (301)                     | 1.8 (20)                               | 1.1 (12)                             |
| Yes                                    | 60.7 (260)                              | 25.6 (104)                      | 30.2 (127)                     | 4.0 (17)                               | 1.6 (7)                              |
| Insomnia disorder (n=1537-1585):       | <b>25.1<sup>a</sup>, p&lt;.0005</b>     | <b>10.1<sup>a</sup>, p=.001</b> | 0.0 <sup>a</sup> , p=.983      | <b>9.7<sup>a</sup>, p=.002</b>         | <b>15.6<sup>a</sup>, p&lt;.0005</b>  |
| No                                     | 43.8 (474)                              | 17.4 (184)                      | 28.0 (297)                     | 1.5 (16)                               | 0.5 (5)                              |
| Yes                                    | 57.5 (289)                              | 24.5 (118)                      | 27.8 (138)                     | 4.2 (21)                               | 2.8 (14)                             |

<sup>1</sup>Headache  $\geq 1$  days per month. <sup>2</sup>Headache >14 days per month.

<sup>a</sup>Pearson Chi-square, with Yates' correction for continuity when used in a 2x2 table.

Significant findings are shown in **bold**.

Table 3. Separate adjusted logistic regression analyses with different headache types as the dependent variables among Norwegian nurses.

| Independent variables   | Frequent headache <sup>1</sup><br>OR (95% CI) <sup>a</sup><br>n=1439-1519 | Migraine<br>OR (95% CI) <sup>a</sup><br>n=1398-1476 | Tension-type headache<br>OR (95% CI) <sup>a</sup><br>n=1416-1495 | Chronic headache <sup>2</sup><br>OR (95% CI) <sup>a</sup><br>n=1432-1512 | Medication-overuse<br>headache OR (95% CI) <sup>a</sup><br>n=1434-1514 |
|-------------------------|---------------------------------------------------------------------------|-----------------------------------------------------|------------------------------------------------------------------|--------------------------------------------------------------------------|------------------------------------------------------------------------|
| Work schedule           |                                                                           |                                                     |                                                                  |                                                                          |                                                                        |
| Day only                | 1.00                                                                      | 1.00                                                | 1.00                                                             | 1.00                                                                     | 1.00                                                                   |
| Two-shift               | 1.07 (0.80-1.44)                                                          | 0.89 (0.62-1.28)                                    | 1.11 (0.79-1.57)                                                 | 1.91 (0.68-5.32)                                                         | 1.49 (0.39-5.80)                                                       |
| Night only              | 1.07 (0.65-1.77)                                                          | 0.75 (0.39-1.44)                                    | 1.30 (0.74-2.28)                                                 | 1.18 (0.20-6.88)                                                         | 2.39 (0.32-17.65)                                                      |
| Three-shift             | 1.01 (0.76-1.35)                                                          | 0.79 (0.55-1.14)                                    | 1.31 (0.94-1.83)                                                 | 1.22 (0.42-3.56)                                                         | 0.86 (0.20-3.70)                                                       |
| Number of night shifts  |                                                                           |                                                     |                                                                  |                                                                          |                                                                        |
| 0 night shifts          | 1.00                                                                      | 1.00                                                | 1.00                                                             | 1.00                                                                     | 1.00                                                                   |
| 1-20 night shifts       | 0.86 (0.66-1.11)                                                          | 0.78 (0.56-1.09)                                    | 1.27 (0.95-1.70)                                                 | 0.73 (0.30-1.74)                                                         | 0.51 (0.14-1.95)                                                       |
| >20 night shifts        | 1.15 (0.90-1.47)                                                          | 0.80 (0.58-1.09)                                    | <b>1.41 (1.07-1.86)</b>                                          | 0.82 (0.38-1.80)                                                         | 0.78 (0.27-2.29)                                                       |
| Number of quick returns |                                                                           |                                                     |                                                                  |                                                                          |                                                                        |
| 0 quick returns         | 1.00                                                                      | 1.00                                                | 1.00                                                             | 1.00                                                                     | 1.00                                                                   |
| 1-20 quick returns      | 1.09 (0.81-1.46)                                                          | 0.83 (0.57-1.21)                                    | 1.30 (0.92-1.82)                                                 | 1.12 (0.41-3.05)                                                         | 0.66 (0.15-3.01)                                                       |
| >20 quick returns       | 1.06 (0.82-1.39)                                                          | 0.81 (0.58-1.12)                                    | 1.23 (0.91-1.67)                                                 | 1.21 (0.50-2.95)                                                         | 1.18 (0.37-3.83)                                                       |
| Shift work disorder     |                                                                           |                                                     |                                                                  |                                                                          |                                                                        |
| No                      | 1.00                                                                      | 1.00                                                | 1.00                                                             | 1.00                                                                     | 1.00                                                                   |
| Yes                     | <b>2.04 (1.62-2.59)</b>                                                   | <b>1.60 (1.21-2.12)</b>                             | 1.19 (0.92-1.54)                                                 | <b>2.45 (1.25-4.80)</b>                                                  | 1.67 (0.64-4.40)                                                       |
| Insomnia disorder       |                                                                           |                                                     |                                                                  |                                                                          |                                                                        |
| No                      | 1.00                                                                      | 1.00                                                | 1.00                                                             | 1.00                                                                     | 1.00                                                                   |
| Yes                     | <b>1.79 (1.43-2.23)</b>                                                   | <b>1.55 (1.18-2.02)</b>                             | 1.01 (0.79-1.29)                                                 | <b>3.03 (1.54-5.95)</b>                                                  | <b>7.62 (2.48-23.41)</b>                                               |

<sup>1</sup>Headache  $\geq 1$  days per month. <sup>2</sup>Headache >14 days per month.

<sup>a</sup>Separate logistic regression analyses for each independent variable with adjustment for sex, age, percentage of full-time equivalent, marital status, and children living at home.

Significant findings are shown in **bold**.

## STROBE Statement—checklist of items that should be included in reports of observational studies

|                              | Item No | Recommendation                                                                                                                                                                                                                                                                                                                                                                                                                                                                                                                                                                                                                                                                                   |
|------------------------------|---------|--------------------------------------------------------------------------------------------------------------------------------------------------------------------------------------------------------------------------------------------------------------------------------------------------------------------------------------------------------------------------------------------------------------------------------------------------------------------------------------------------------------------------------------------------------------------------------------------------------------------------------------------------------------------------------------------------|
| <b>Title and abstract</b>    | 1       | (a) Indicate the study's design with a commonly used term in the title or the abstract<br>(b) Provide in the abstract an informative and balanced summary of what was done and what was found                                                                                                                                                                                                                                                                                                                                                                                                                                                                                                    |
| See page 1 and 3             |         |                                                                                                                                                                                                                                                                                                                                                                                                                                                                                                                                                                                                                                                                                                  |
| <b>Introduction</b>          |         |                                                                                                                                                                                                                                                                                                                                                                                                                                                                                                                                                                                                                                                                                                  |
| Background/rationale         | 2       | Explain the scientific background and rationale for the investigation being reported                                                                                                                                                                                                                                                                                                                                                                                                                                                                                                                                                                                                             |
| See page 5 and 6             |         |                                                                                                                                                                                                                                                                                                                                                                                                                                                                                                                                                                                                                                                                                                  |
| Objectives                   | 3       | State specific objectives, including any prespecified hypotheses                                                                                                                                                                                                                                                                                                                                                                                                                                                                                                                                                                                                                                 |
| See page 6                   |         |                                                                                                                                                                                                                                                                                                                                                                                                                                                                                                                                                                                                                                                                                                  |
| <b>Methods</b>               |         |                                                                                                                                                                                                                                                                                                                                                                                                                                                                                                                                                                                                                                                                                                  |
| Study design                 | 4       | Present key elements of study design early in the paper                                                                                                                                                                                                                                                                                                                                                                                                                                                                                                                                                                                                                                          |
| See page 6 and 7             |         |                                                                                                                                                                                                                                                                                                                                                                                                                                                                                                                                                                                                                                                                                                  |
| Setting                      | 5       | Describe the setting, locations, and relevant dates, including periods of recruitment, exposure, follow-up, and data collection                                                                                                                                                                                                                                                                                                                                                                                                                                                                                                                                                                  |
| See page 6 and 7             |         |                                                                                                                                                                                                                                                                                                                                                                                                                                                                                                                                                                                                                                                                                                  |
| Participants                 | 6       | (a) <i>Cohort study</i> —Give the eligibility criteria, and the sources and methods of selection of participants. Describe methods of follow-up<br><i>Case-control study</i> —Give the eligibility criteria, and the sources and methods of case ascertainment and control selection. Give the rationale for the choice of cases and controls<br><i>Cross-sectional study</i> —Give the eligibility criteria, and the sources and methods of selection of participants<br>(b) <i>Cohort study</i> —For matched studies, give matching criteria and number of exposed and unexposed<br><i>Case-control study</i> —For matched studies, give matching criteria and the number of controls per case |
| See page 6                   |         |                                                                                                                                                                                                                                                                                                                                                                                                                                                                                                                                                                                                                                                                                                  |
| Variables                    | 7       | Clearly define all outcomes, exposures, predictors, potential confounders, and effect modifiers. Give diagnostic criteria, if applicable                                                                                                                                                                                                                                                                                                                                                                                                                                                                                                                                                         |
| See page 7 and 8             |         |                                                                                                                                                                                                                                                                                                                                                                                                                                                                                                                                                                                                                                                                                                  |
| Data sources/<br>measurement | 8*      | For each variable of interest, give sources of data and details of methods of assessment (measurement). Describe comparability of assessment methods if there is more than one group                                                                                                                                                                                                                                                                                                                                                                                                                                                                                                             |
| See page 6, 7 and 8          |         |                                                                                                                                                                                                                                                                                                                                                                                                                                                                                                                                                                                                                                                                                                  |
| Bias                         | 9       | Describe any efforts to address potential sources of bias                                                                                                                                                                                                                                                                                                                                                                                                                                                                                                                                                                                                                                        |
| See page 12                  |         |                                                                                                                                                                                                                                                                                                                                                                                                                                                                                                                                                                                                                                                                                                  |
| Study size                   | 10      | Explain how the study size was arrived at                                                                                                                                                                                                                                                                                                                                                                                                                                                                                                                                                                                                                                                        |
| See page 6                   |         |                                                                                                                                                                                                                                                                                                                                                                                                                                                                                                                                                                                                                                                                                                  |
| Quantitative variables       | 11      | Explain how quantitative variables were handled in the analyses. If applicable, describe which groupings were chosen and why                                                                                                                                                                                                                                                                                                                                                                                                                                                                                                                                                                     |
| See page 8                   |         |                                                                                                                                                                                                                                                                                                                                                                                                                                                                                                                                                                                                                                                                                                  |
| Statistical methods          | 12      | (a) Describe all statistical methods, including those used to control for confounding<br>(b) Describe any methods used to examine subgroups and interactions                                                                                                                                                                                                                                                                                                                                                                                                                                                                                                                                     |

(c) Explain how missing data were addressed

(d) *Cohort study*—If applicable, explain how loss to follow-up was addressed

*Case-control study*—If applicable, explain how matching of cases and controls was addressed

*Cross-sectional study*—If applicable, describe analytical methods taking account of sampling strategy

(e) Describe any sensitivity analyses

See page 8 and 9

## Results

|              |     |                                                                                                                                                                                                   |
|--------------|-----|---------------------------------------------------------------------------------------------------------------------------------------------------------------------------------------------------|
| Participants | 13* | (a) Report numbers of individuals at each stage of study—eg numbers potentially eligible, examined for eligibility, confirmed eligible, included in the study, completing follow-up, and analysed |
|              |     | (b) Give reasons for non-participation at each stage                                                                                                                                              |
|              |     | (c) Consider use of a flow diagram                                                                                                                                                                |

See page 9

|                  |     |                                                                                                                                          |
|------------------|-----|------------------------------------------------------------------------------------------------------------------------------------------|
| Descriptive data | 14* | (a) Give characteristics of study participants (eg demographic, clinical, social) and information on exposures and potential confounders |
|                  |     | (b) Indicate number of participants with missing data for each variable of interest                                                      |
|                  |     | (c) <i>Cohort study</i> —Summarise follow-up time (eg, average and total amount)                                                         |

Page 9 and 17

|              |     |                                                                                                      |
|--------------|-----|------------------------------------------------------------------------------------------------------|
| Outcome data | 15* | <i>Cohort study</i> —Report numbers of outcome events or summary measures over time                  |
|              |     | <i>Case-control study</i> —Report numbers in each exposure category, or summary measures of exposure |
|              |     | <i>Cross-sectional study</i> —Report numbers of outcome events or summary measures                   |

Page 9 and 10

|              |    |                                                                                                                                                                                                              |
|--------------|----|--------------------------------------------------------------------------------------------------------------------------------------------------------------------------------------------------------------|
| Main results | 16 | (a) Give unadjusted estimates and, if applicable, confounder-adjusted estimates and their precision (eg, 95% confidence interval). Make clear which confounders were adjusted for and why they were included |
|              |    | (b) Report category boundaries when continuous variables were categorized                                                                                                                                    |
|              |    | (c) If relevant, consider translating estimates of relative risk into absolute risk for a meaningful time period                                                                                             |

Page 18 and 19

|                |    |                                                                                                |
|----------------|----|------------------------------------------------------------------------------------------------|
| Other analyses | 17 | Report other analyses done—eg analyses of subgroups and interactions, and sensitivity analyses |
|----------------|----|------------------------------------------------------------------------------------------------|

Page 18 and 19

## Discussion

|             |    |                                                          |
|-------------|----|----------------------------------------------------------|
| Key results | 18 | Summarise key results with reference to study objectives |
|-------------|----|----------------------------------------------------------|

Page 10

|             |    |                                                                                                                                                            |
|-------------|----|------------------------------------------------------------------------------------------------------------------------------------------------------------|
| Limitations | 19 | Discuss limitations of the study, taking into account sources of potential bias or imprecision. Discuss both direction and magnitude of any potential bias |
|-------------|----|------------------------------------------------------------------------------------------------------------------------------------------------------------|

Page 12

|                |    |                                                                                                                                                                            |
|----------------|----|----------------------------------------------------------------------------------------------------------------------------------------------------------------------------|
| Interpretation | 20 | Give a cautious overall interpretation of results considering objectives, limitations, multiplicity of analyses, results from similar studies, and other relevant evidence |
|----------------|----|----------------------------------------------------------------------------------------------------------------------------------------------------------------------------|

Page 10-12

|                  |    |                                                                       |
|------------------|----|-----------------------------------------------------------------------|
| Generalisability | 21 | Discuss the generalisability (external validity) of the study results |
|------------------|----|-----------------------------------------------------------------------|

Page 12

**Other information**

---

Funding 22 Give the source of funding and the role of the funders for the present study and, if applicable, for the original study on which the present article is based

Page 13

\*Give information separately for cases and controls in case-control studies and, if applicable, for exposed and unexposed groups in cohort and cross-sectional studies.

**Note:** An Explanation and Elaboration article discusses each checklist item and gives methodological background and published examples of transparent reporting. The STROBE checklist is best used in conjunction with this article (freely available on the Web sites of PLoS Medicine at <http://www.plosmedicine.org/>, Annals of Internal Medicine at <http://www.annals.org/>, and Epidemiology at <http://www.epidem.com/>). Information on the STROBE Initiative is available at [www.strobe-statement.org](http://www.strobe-statement.org).



# BMJ Open

## Migraine, tension-type headache and medication-overuse headache in a large population of shift working nurses

|                                 |                                                                                                                                                                                                                                                                                                                                                                                                                                                                                                                                                                                                                                                                                                                                                                                                                               |
|---------------------------------|-------------------------------------------------------------------------------------------------------------------------------------------------------------------------------------------------------------------------------------------------------------------------------------------------------------------------------------------------------------------------------------------------------------------------------------------------------------------------------------------------------------------------------------------------------------------------------------------------------------------------------------------------------------------------------------------------------------------------------------------------------------------------------------------------------------------------------|
| Journal:                        | <i>BMJ Open</i>                                                                                                                                                                                                                                                                                                                                                                                                                                                                                                                                                                                                                                                                                                                                                                                                               |
| Manuscript ID                   | bmjopen-2018-022403.R1                                                                                                                                                                                                                                                                                                                                                                                                                                                                                                                                                                                                                                                                                                                                                                                                        |
| Article Type:                   | Research                                                                                                                                                                                                                                                                                                                                                                                                                                                                                                                                                                                                                                                                                                                                                                                                                      |
| Date Submitted by the Author:   | 29-Jun-2018                                                                                                                                                                                                                                                                                                                                                                                                                                                                                                                                                                                                                                                                                                                                                                                                                   |
| Complete List of Authors:       | Bjorvatn, Bjørn; Universitetet i Bergen Det medisinsk-odontologiske fakultet, Department of Global Public Health and Primary Care; Haukeland Universitetssjukehus, Norwegian Competence Center for Sleep Disorders Pallesen, Ståle; Universitetet i Bergen, Department of Psychosocial Science, Bergen, Norway; Haukeland Universitetssjukehus, Norwegian Competence Center for Sleep Disorders Moen, Bente; Universitetet i Bergen Det medisinsk-odontologiske fakultet, Department of Global Public Health and Primary Care Waage, Siri; Universitetet i Bergen Det medisinsk-odontologiske fakultet, Department of Global Public Health and Primary Care; Haukeland Universitetssjukehus, Norwegian Competence Center for Sleep Disorders Kristoffersen, Espen Saxhaug; University of Oslo, Department of General Practice |
| <b>Primary Subject Heading</b>: | Occupational and environmental medicine                                                                                                                                                                                                                                                                                                                                                                                                                                                                                                                                                                                                                                                                                                                                                                                       |
| Secondary Subject Heading:      | Neurology, Epidemiology                                                                                                                                                                                                                                                                                                                                                                                                                                                                                                                                                                                                                                                                                                                                                                                                       |
| Keywords:                       | chronic headache, insomnia, shift work disorder, night work, quick returns                                                                                                                                                                                                                                                                                                                                                                                                                                                                                                                                                                                                                                                                                                                                                    |
|                                 |                                                                                                                                                                                                                                                                                                                                                                                                                                                                                                                                                                                                                                                                                                                                                                                                                               |

SCHOLARONE™  
Manuscripts

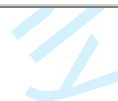

1  
2  
3 **Migraine, tension-type headache and medication-overuse headache in a**  
4 **large population of shift working nurses – a cross-sectional study**  
5  
6  
7

8 Bjørn Bjorvatn MD PhD<sup>1,2</sup>, Ståle Pallesen PhD<sup>2,3</sup>, Bente E. Moen MD PhD<sup>1</sup>, Siri Waage  
9 PhD<sup>1,2</sup>, Espen S. Kristoffersen MD PhD<sup>4</sup>  
10  
11

12  
13 <sup>1</sup> Department of Global Public Health and Primary Care, University of Bergen, Norway.

14 <sup>2</sup> Norwegian Competence Center for Sleep Disorders, Haukeland University Hospital,  
15 Norway.  
16

17 <sup>3</sup> Department of Psychosocial Science, University of Bergen, Norway.  
18

19 <sup>4</sup> Department of General Practice, University of Oslo, Norway.  
20  
21  
22  
23

24 Corresponding author:

25 Bjørn Bjorvatn

26 Department of Global Public Health and Primary Care

27 University of Bergen

28 Kalfarveien 31, N-5018 Bergen

29 Norway

30 Phone: +4755586088

31 Fax: +4755586130

32 Email: [bjorn.bjorvatn@uib.no](mailto:bjorn.bjorvatn@uib.no)  
33  
34  
35  
36  
37  
38  
39  
40  
41  
42  
43  
44  
45  
46  
47  
48  
49  
50  
51  
52  
53  
54  
55  
56  
57  
58  
59  
60

### Key messages

What is already known about this subject?

- Shift work is associated with poor sleep, and poor sleep may trigger headache.  
However, whether there is an association between shift work and headache is unclear.

What are the new findings?

- Tension-type headache was associated with high number of night shifts, but neither migraine, tension-type headache, nor medication-overuse headache were associated with work schedule. Several types of headaches were however associated with insomnia disorder and shift work disorder.

How might it impact on clinical practice in the foreseeable future?

- As no clear association was found between different types of headache and shift work schedules, headache may not be a major concern for the majority of shift workers.

## ABSTRACT

### Objectives

To investigate associations between different types of headache and shift work.

### Design, participants and outcome measures

Nurses with different work schedules (day work, two-shift rotation, night work, three-shift rotation) participated in a cohort study with annual surveys that started in 2008/2009. In 2014 (wave 6), a comprehensive headache instrument was included in the survey, in which 1585 nurses participated. Headaches were assessed according to the International Classification of Headache Disorders IIIb. Frequent headache ( $\geq 1$  day per month), migraine, tension-type headache, chronic headache (headache  $>14$  days per month), and medication-overuse headache (chronic headache + acute headache medication  $\geq 10$  days last month) comprised the dependent variables. Adjusted (for sex, age, percentage of full-time equivalent, marital status, children living at home) logistic regression analyses were conducted with work schedule, number of night shifts worked last year, number of quick returns ( $<11$  hours in-between shifts) last year, shift work disorder, and insomnia disorder as predictors.

### Results

Frequent headache, migraine, and chronic headache were associated with shift work disorder (OR 2.04, 1.62-2.59; 1.60, 1.21-2.12; 2.45, 1.25-4.80, respectively) and insomnia disorder (OR 1.79, 1.43-2.23; 1.55, 1.18-2.02; 3.03, 1.54-5.95, respectively), but not with work schedule, number of night shifts or number of quick returns. Tension-type headache was only associated with  $>20$  night shifts last year (OR 1.41, 1.07-1.86). Medication-overuse headache was only associated with insomnia disorder (OR 7.62, 2.48-23.41).

### Conclusions

We did not find any association between different types of headache and work schedule. However, tension-type headache was associated with high number of night shifts. Nurses with sleep disorders (insomnia disorder and shift work disorder) reported higher prevalence of frequent headache, migraine, chronic headache and medication-overuse headache (only insomnia) compared to nurses not having insomnia disorder and shift work disorder, respectively.

**Keywords:** chronic headache, insomnia, shift work disorder, night work, quick returns

### Strengths and limitations of this study

- A large and homogeneous sample of nurses with different work schedules
- Validated questionnaires for diagnosing different types of headache and sleep disorders
- No clinical interviews by physicians
- Few nurses with some of the headache subtypes which limits statistical power in these analyses
- No conclusions about causality due to the cross-sectional design

For peer review only

## INTRODUCTION

Shift work is associated with impaired health, and several studies show that working shifts increase the risk of sleep disturbances, cardiovascular disease, metabolic disorders, and cancer.<sup>1</sup> Sleep disturbances are considered to be the most common complaints, especially among rotating shift workers and night workers.<sup>2,3</sup> Night workers are on duty during their biological resting phase and are enforced to schedule sleep to their biological active phase. This has been proposed as a causative factor for sleep and health problems.<sup>1</sup> Accordingly, studies suggest that the number of night shifts per year and the number of quick returns (defined as shifts with less than 11 hours in-between) per year are associated with increased risk of health complaints and sick leave.<sup>4-7</sup>

Recently, the focus on shift workers fulfilling the criteria for shift work disorder (SWD) has been intensified.<sup>8-10</sup> SWD is characterized by complaints of sleep problems and excessive sleepiness caused by work schedules overlapping with the habitual time for sleep.<sup>8,11</sup> This disorder affects 4.8-44.3% of nurses depending on type of work schedule.<sup>12</sup> SWD has been associated with impaired health, e.g. depression and hypertension.<sup>8,10,12,13</sup>

Few studies have specifically investigated the association between shift work and the presence and severity of headache. This is somewhat surprising, considering the association between sleep and headache.<sup>14-16</sup> Many of the existing studies suffer from methodological limitations, such as low number of participants (<300)<sup>17-19</sup> and not using validated headache questions.<sup>17-21</sup> One study from China reported that greater number of night shifts is positively associated with prevalence of headache,<sup>22</sup> and another study from Taiwan suggested that shift work increases the risk of migraine.<sup>23</sup> A Scandinavian study found an association between evening work, but not night work, and migraine.<sup>16</sup> The relationship between sleep and headache seems to be bidirectional. Lack of sleep can trigger headache, but sleep may also alleviate headache.<sup>15</sup> Disturbed sleep due to shift work is therefore likely to increase the risk of headache. The most common primary headaches in the general population are migraine and tension-type headache.<sup>24</sup> Most studies have focused on migraine and shift work,<sup>15,16</sup> although tension-type headache (TTH) is considered the most common form of headache with an estimated worldwide prevalence of approximately 40%.<sup>24</sup> The prevalence of migraine in the general population is 10-16%.<sup>24,25</sup> Chronic headache is defined as headache occurring more than 14 days per month and is present in 2-4% of the general population.<sup>24-27</sup> Medication-overuse headache (MOH) is a condition characterized by chronic headache and overuse of

1  
2  
3 acute headache medications, usually defined as intake of acute pain or migraine medications  
4 10 or more days per month.<sup>26 28</sup> The prevalence of medication-overuse headache in the  
5 general population is 1-2%, with more females being afflicted than males.<sup>28 29</sup>  
6  
7  
8

9 As headache is common in the general population and since sleep loss, that often occurs  
10 concomitant with shift work, may trigger headache, we aimed to investigate whether different  
11 types of headache (i.e. migraine, TTH, chronic headache, MOH) were related to work  
12 schedules, number of night shifts, number of quick returns, SWD, and insomnia disorder.  
13 Nurses comprise a large population of shift workers and are thereby suitable for such studies.  
14 We hypothesized that nurses involved in night and shift work would report a higher  
15 prevalence of headaches compared to day workers.  
16  
17  
18  
19  
20  
21  
22  
23

## 24 **METHODS**

### 25 **Procedure and participants**

26 The data stemmed from the ongoing longitudinal cohort study “SURvey of Shift work, Sleep  
27 and Health (SUSSH)” among Norwegian nurses. The first data collection was conducted  
28 during winter 2008/2009 (wave 1) when a sample of 5400 nurses was randomly selected from  
29 the Norwegian Nurses Organisation’s (NNO) membership roll and invited to participate. A  
30 total of 2059 (response rate = 38.1%) nurses completed the questionnaire at the first wave. In  
31 order to increase the study population, an additional sample of 906 newly educated nurses  
32 (response rate = 33.1%) was recruited in 2009. The total sample in wave 1 therefore included  
33 2965 nurses, see details in Bjorvatn et al.<sup>30</sup> The nurses who responded to the first wave have  
34 been invited to participate in annual follow-ups by receiving questionnaires sent by postal  
35 mail with pre-paid envelopes for returning the completed forms. Up to two reminders were  
36 sent to nurses who did not respond. The nurses who returned the questionnaire took part in a  
37 lottery, in which 25 individuals won a gift card with a value of 500 NOK (~ 60 US \$). The  
38 present study reports findings based on data from the sixth (2014) wave, in which the  
39 headache questionnaire was included. A total of 1991 out of 2869 eligible nurses completed  
40 the questionnaire at wave 6, yielding a response rate of 69.4%. Nurses that reported that they  
41 were no longer working as nurses at wave 6 were excluded from the analyses, leaving a total  
42 study population of 1585 nurses.  
43  
44  
45  
46  
47  
48  
49  
50  
51  
52  
53

### 54 **Demographics**

1  
2  
3 The demographic variables were assessed in wave 6, except for age and sex that were  
4 registered in wave 1. The nurses responded to questions about marital status  
5 (married/cohabiting; yes/no), children living at home (yes/no), percentage of full-time  
6 equivalent (<50%, 50-75%, 76-90%, >90% position), work schedule (day only, evening only,  
7 two-shift rotation (day and evening), night only, three-shift rotation (day, evening and night),  
8 and other schedules including night work), number of night shifts worked last year, and  
9 number of quick returns (defined as less than 11 hours between consecutive work shifts)  
10 worked last year. Few nurses worked “evening only” (n=6) and “other schedules including  
11 night shifts” (n=67), and these shifts were therefore excluded in the analysis of the association  
12 between work schedule and headache.  
13  
14  
15  
16  
17  
18  
19

## 20 Headache

21  
22 The comprehensive headache questionnaire was designed to determine whether the nurses  
23 suffered from headache, and fulfilled the International Classification of Headache Disorders  
24 (ICHD) IIIb criteria for migraine, tension-type headache (TTH) and medication-overuse  
25 headache (MOH).<sup>26</sup> The nurses were first screened: “Have you suffered from headache during  
26 the last year?”, and only nurses who answered “yes” were asked to respond to the other  
27 headache items. The screening positive headache sufferers were asked to report frequency,  
28 attack duration, intensity and accompanying headache symptoms to classify migraine and  
29 TTH, accordingly. The diagnoses of migraine and TTH were mutually exclusive. Frequent  
30 headache was defined as headache  $\geq 1$  day per month, and chronic headache was defined as  
31 headache >14 days per month, independently of the underlying subtype of headache. MOH  
32 was defined as chronic headache and intake of acute headache medication  $\geq 10$  days last  
33 month. The questionnaire-based headache diagnoses used here have previously been validated  
34 in a large unselected general population sample.<sup>25 31 32</sup>  
35  
36  
37  
38  
39  
40  
41  
42  
43  
44

## 45 Shift work disorder (SWD)

46 SWD was measured with three previous used questions<sup>11 12</sup> based on the minimal criteria  
47 listed in the second edition of the International Classification of Sleep Disorders (ICSD-2).<sup>33</sup>  
48 The questions were: a) Do you experience either difficulties sleeping or experience excessive  
49 sleepiness? (yes/no), b) Is the sleep or sleepiness problem related to a work schedule that  
50 makes you work when you normally would sleep? (yes/no), c) Have you had this sleep or  
51 sleepiness problem related to the work schedule for at least one month? (yes/no). Participants  
52 were classified as having SWD if they endorsed all three questions.  
53  
54  
55  
56  
57



## Insomnia disorder

Insomnia symptoms were evaluated with Bergen Insomnia Scale (BIS).<sup>34</sup> The BIS consists of six items, and was developed based on the diagnostic criteria for insomnia according to 4<sup>th</sup> and text revision version of the Diagnostic and Statistical Manual for Mental Disorders (DSM-IV-TR).<sup>35</sup> The items are scored along an eight-point scale indicating the number of days per week for which a specific insomnia symptom is experienced (0-7 days). The items refer to sleep onset (sleep latency exceeding 30 minutes), wake after sleep onset (more than 30 minutes), early morning awakening (more than 30 minutes), non-restorative sleep, daytime impairment, and dissatisfaction with sleep. The time frame is insomnia symptoms experienced during the past month. According to DSM-5 criteria,<sup>36</sup> insomnia disorder is defined as scoring 3 days per week or more on at least one of the first three items as well as 3 days per week or more on at least one of the latter two items. Missing responses to any of the insomnia questions were treated as not reporting that specific insomnia symptom. The scale has acceptable test-retest reliability, and good convergent and discriminative validity in relation to other self-report measures as well as to polysomnographic data.<sup>34</sup> Cronbach's alpha for the BIS was 0.83 in the present sample.

## Ethics

The study was approved by the Regional Committee for Medical and Health Research Ethics of Western Norway (REK-West, no 088.08). Written informed consent was obtained from all participants.

## Patient and public involvement

The questionnaire was developed by a group of researchers experienced with shift work and shift work related problems. The participating nurses were not involved in the design, recruitment or conduct of the study. The results will be disseminated to the study participants in the yearly report we send to the journal of the Norwegian nurses. Here we address last year's published data from the cohort study. In addition, the results will appear on a designated website – [www.sussh.no](http://www.sussh.no) (after publication).

## Statistics

The statistical analyses were conducted with IBM SPSS Statistics 23 for Windows. The prevalence of frequent headache, migraine, TTH, chronic headache, and MOH in relation to

1  
2  
3 the different work schedules, categories of night shifts and quick returns last year, SWD and  
4 insomnia disorder were explored by the Pearson chi-square tests (with Yates' correction for  
5 continuity when used in a 2 x 2 table). In addition, separate adjusted (with sex, age,  
6 percentage of full-time equivalent, marital status, children living at home as co-variables)  
7 logistic regression analyses were performed to assess different headaches (frequent headache,  
8 migraine, TTH, chronic headache, MOH) as dependent variables with work schedule (day  
9 only as a reference, compared to two-shift rotation, night only and three-shift rotation),  
10 number of night shifts last year (0, 1-20, >20 night shifts), number of quick returns last year  
11 (0, 1-20, >20 quick returns), SWD, and insomnia disorder as predictors. Significance level  
12 was set to .05.  
13  
14  
15  
16  
17  
18  
19  
20  
21

## 22 RESULTS

23 Demographic characteristics are presented in Table 1. Most of the nurses were females  
24 (90.5%) and mean age in wave 1 was 32.5 years (SD=8.5). Three-shift and two-shift rotation  
25 were the most common work schedules (Table 1). Mean number of night shifts last year was  
26 23.5 (SD=36.7) and mean number of quick returns last year was 33.4 (SD=35.4). Shift work  
27 disorder and insomnia disorder were present in 27.3% and 31.7% of the nurses, respectively.  
28 In total, 56.0% of the nurses (n=885) reported headache complaints during the last year, and  
29 48.1% (n=763) frequent headache ( $\geq 1$  day per month). Migraine, TTH, chronic headache, and  
30 MOH were present in 19.6% (n=302), 27.9% (n=435), 2.3% (n=37), and 1.2% (n=19) of the  
31 total sample of nurses, respectively (Table 1).  
32  
33  
34  
35  
36  
37  
38  
39

40 We did not find any significant differences between the prevalence of frequent headache,  
41 migraine, TTH, chronic headache or MOH across work schedules (Table 2). Similarly,  
42 logistic regression analyses with adjustment for sex, age, percentage of full-time equivalent,  
43 marital status, and children living at home, revealed no association between the different  
44 headache types and work schedule (Table 3).  
45  
46  
47  
48  
49

50 The prevalence of TTH was higher in nurses working night shifts last year compared to those  
51 not working night shifts, but we found no association between frequent headache, migraine,  
52 chronic headache or MOH and number of night shifts last year (Table 2). Similarly, in the  
53 adjusted logistic regression analysis, TTH was significantly associated with >20 night shifts  
54  
55  
56  
57  
58  
59  
60

1  
2  
3 last year (OR=1.41, 1.07-1.86) (Table 3). There were no associations between the different  
4 headache types and number of quick returns last year (Tables 2 and 3).  
5  
6

7  
8 The prevalence of frequent headache, migraine, and chronic headache were all clearly higher  
9 among nurses with SWD compared to nurses without SWD (Table 2). Furthermore, adjusted  
10 logistic regression analyses revealed that frequent headache, migraine, and chronic headache  
11 all were significantly associated with SWD, with odd ratios 2.04, 1.62-2.59; 1.60, 1.21-2.12;  
12 2.45, 1.25-4.80, respectively (Table 3). TTH and MOH were not significantly associated with  
13 SWD (Tables 2 and 3).  
14  
15  
16

17  
18 The prevalence of frequent headache, migraine, chronic headache, and MOH were all clearly  
19 higher among nurses with insomnia disorder compared to nurses without insomnia disorder  
20 (Table 2). These findings were also present in the adjusted logistic regression analyses, with  
21 OR 1.79, 1.43-2.23; 1.55, 1.18-2.02; 3.03, 1.54-5.95, 7.62, 2.48-23.41, respectively (Table 3).  
22 The only headache type that was not associated with insomnia disorder was TTH (Tables 2  
23 and 3).  
24  
25  
26  
27  
28  
29  
30  
31

## 32 **DISCUSSION**

33 The present study showed that nurses with different work schedules reported similar  
34 prevalence of frequent headache, migraine, TTH, chronic headache, and MOH. These  
35 findings did thus not support our hypothesis that shift working nurses would report higher  
36 prevalence of headaches than day workers. However, nurses with high number of night shifts  
37 during the last year reported higher prevalence of TTH than nurses with no night shifts.  
38 Furthermore, nurses with SWD and insomnia disorder reported higher prevalence of most  
39 types of headache compared to nurses without SWD and insomnia disorder, respectively.  
40  
41  
42  
43  
44  
45

46 We hypothesized that night and shift work would be associated with higher prevalence of  
47 headaches. This was based on the well-known association between lack of sleep and  
48 headache.<sup>15 37</sup> It is well known that both rotating shift work schedules and night work  
49 normally will cause circadian rhythm misalignment and sleep deprivation.<sup>9 38 39</sup> In line with  
50 this, a Chinese study showed that number of night shifts was positively associated with  
51 prevalence of different types of headache.<sup>22</sup> However, a recent Danish study did not find any  
52 association between treatment-seeking migraine and night work or variable working hours.<sup>16</sup>  
53  
54  
55  
56  
57  
58  
59  
60

1  
2  
3 In the latter study, only fixed evening work was found to be associated (positively) with  
4 migraine. One possible explanation for the lack of association between headaches and work  
5 schedules in the present study may be the “healthy shift worker effect”. This is based on the  
6 assumption that shift workers have better health than those who avoid or quit shift work.<sup>40</sup>  
7 Hence, nurses with headaches may be more reluctant to work shifts or quit shift work more  
8 frequently than others, leading to underestimates of the possible negative effects of shift work  
9 in studies like the present one.  
10  
11  
12  
13  
14

15  
16 Similarly, the number of night shifts worked the last year was not associated with frequent  
17 headache, migraine, chronic headache, or MOH. However, TTH was associated with high  
18 number of night shifts. This finding suggests that there may be different sleep-headache  
19 mechanisms in TTH than in e.g. migraine.<sup>41</sup> In line with this, a polysomnography study found  
20 that TTH patients need more sleep than healthy controls, and that inadequate sleep may  
21 contribute to increased pain sensitivity in TTH.<sup>42</sup> Furthermore, a high number of night shifts  
22 may not necessarily only cause sleep deprivation, but may also be experienced as stressful and  
23 thereby precipitate TTH. High work stress is a risk factor for primary headaches, especially  
24 tension-type headache.<sup>22 43</sup> Whether circadian misalignment in itself (often occurring among  
25 shift and night workers) triggers headaches is not known, and this topic should receive more  
26 attention in the future.  
27  
28  
29  
30  
31  
32  
33  
34

35  
36 Many Norwegian nurses with rotating shift schedules have quick returns (defined as shifts  
37 separated by less than 11 hours) in their roster. For the nurses, most quick returns involve  
38 working an evening shift followed by a day shift. Such short rest in-between shifts typically  
39 cause sleep deprivation and health problems.<sup>45</sup> However, we found no association between  
40 headaches and quick returns. This was surprising, and may suggest that short-term sleep  
41 deprivation, as seen with quick returns, may not pose a major problem in relation to headache  
42 risk. This lack of association was found even though a high percentage of the nurses reported  
43 frequent quick returns.  
44  
45  
46  
47  
48  
49

50  
51 In the present study, frequent headache, migraine, and chronic headache were all associated  
52 with SWD. These novel findings suggest that nurses who do not cope well with shift work are  
53 at increased risk of other health complaints like headaches. However, our study cannot say  
54 anything about cause-and-effect. That is, it may be that headache increases the risk of SWD.  
55 Future studies should consequently focus on whether there may be common vulnerability  
56  
57  
58  
59  
60

1  
2  
3 factors (e.g. genetic, health behaviour, etc.) between headaches and sleep related disorders.  
4 Interestingly and surprisingly, TTH was not associated with SWD, suggesting that different  
5 pathophysiological mechanisms may be involved across the different types of headaches. This  
6 issue warrants further studies.  
7  
8  
9

10  
11 Insomnia disorder was associated with all headache types, except TTH, which is in line with  
12 the findings from several other studies.<sup>15 44 45</sup> However, few studies have used formal  
13 diagnostic criteria for insomnia disorder, like the present study. Thus, one major asset with the  
14 present study was the use of ICSD and ICHD criteria for sleep disorders and headache  
15 classification, respectively. Surprisingly, TTH was not associated with insomnia disorder in  
16 our study, in contrast to two other population-based studies.<sup>37 46</sup> However, none of those  
17 studies used the formal diagnostic criteria for insomnia disorder. Lack of association between  
18 insomnia disorder and TTH may be related to methodological limitations, but suggests the  
19 need for more research, and especially studies with a longitudinal design. MOH was  
20 significantly associated with insomnia disorder, but not with any of the work-related  
21 variables. In fact, our data indicate that nurses with insomnia disorder had more than 7 times  
22 higher risk of MOH than those without insomnia disorder. This strong association warrants  
23 further studies.  
24  
25  
26  
27  
28  
29  
30  
31  
32

### 33 **Strengths and limitations**

34  
35 The present study was based on a large and homogeneous sample of nurses that limits the  
36 influence from possible confounding variables. Other strengths were the use of validated  
37 headache diagnoses and a validated insomnia scale as well as criteria-based SWD diagnostics.  
38 Furthermore, the study did not have a primary focus on headache, it was one of many health  
39 outcomes. Thus, a possible selection bias related to headache was unlikely. In terms of  
40 limitations, it should be noted that the response rate in the first wave was low, which may  
41 make the interpretation of the data and conclusions less generalizable. Still, the response rate  
42 in wave 6 where the headache questionnaire was included was high. Due to the high number  
43 of participants in our survey, it was not feasible to apply the gold standard, i.e. a clinical  
44 interview by a physician experienced in headache and sleep diagnostics. For the same reason,  
45 prospective headache and sleep diaries were not feasible. However, the questionnaire-based  
46 headache diagnostic procedures have been included in several previous large population-  
47 based studies and have been validated against clinical interviews with a high degree of  
48 agreement.<sup>25 31 32</sup> A limitation of the headache questionnaire is that migraine and TTH are  
49  
50  
51  
52  
53  
54  
55  
56  
57  
58  
59  
60

1  
2  
3 mutually exclusive, i.e. the questionnaire only allows the participant to be diagnosed with the  
4 most bothersome headache subtype even though some might suffer from both migraine and  
5 TTH<sup>25</sup>. It is possible that differences between migraine and TTH are underestimated owing to  
6 the presence of people with TTH in the migraine group and vice versa, making the two groups  
7 more similar than they actually are. Thus, some caution is needed when interpreting the  
8 results. As migraine is hierarchically more important in the headache classification<sup>26</sup> than  
9 TTH, it is possible that there is an underestimation of TTH in the sample. However, the  
10 prevalence of the different headaches reported in the present study is similar to those reported  
11 previously,<sup>22 24 25 27 29</sup> strengthening the assumption of representativeness of the study  
12 population. The number of participants with chronic headache and MOH were low, limiting  
13 the statistical power in these analyses. We adjusted for several confounders known to  
14 influence shift work and headache, however, many other relevant factors were not adjusted  
15 for, e.g. physical inactivity, stress, and psychological disturbances. Lack of such adjustment  
16 should be taken into consideration when interpreting the results. Finally, it should be noted  
17 that the cross-sectional design does not permit any conclusions about causality in the  
18 relationship between headaches and work variables.  
19  
20  
21  
22  
23  
24  
25  
26  
27  
28  
29

### 30 **Conclusion**

31 We found a significant association between headaches and SWD and insomnia disorder in our  
32 cohort of nurses. In fact, nurses with SWD reported higher prevalence of frequent headache,  
33 migraine, and chronic headache compared to nurses not having SWD. Similarly, nurses with  
34 insomnia disorder, compared to those without, reported higher prevalence of all types of  
35 headache, except TTH. Although we did not find any association between different types of  
36 headache and work schedule or quick returns, TTH was associated with high number of night  
37 shifts. Future longitudinal research should be conducted in order to investigate the  
38 causality/directionality of association between headaches and work variables.  
39  
40  
41  
42  
43  
44  
45  
46  
47

### 48 **Funding**

49 The study received a grant for practical administration and data collection from The Western  
50 Norway Regional Health Authority (grant number 911386, no personal payment/salary). The  
51 Norwegian Nurses Organization has provided grants to cover some of the the running  
52 expenses of the SUSSH study. The study was further partly funded from Nordforsk, Nordic  
53 Program on Health and Welfare (74809).  
54  
55  
56  
57

### Competing interests statement

None declared.

### Data sharing

No additional data available.

### Contributorship statement

BB: contributed to the design of the study, data collection, data analysis, drafted the paper, and approved the final version.

SP: contributed to the design of the study, data collection, data analysis, revised the paper, and approved the final version.

BEM: contributed to the design of the study, data collection, data analysis, revised the paper, and approved the final version.

SW: contributed to the design of the study, data collection, data analysis, revised the paper, and approved the final version.

ESK: contributed to the design of the study, data analysis, revised the paper, and approved the final version.

### References

- 1 Kecklund G, Axelsson J. Health consequences of shift work and insufficient sleep. *BMJ* 2016;355:i5210.
- 2 Akerstedt T. Shift work and disturbed sleep/wakefulness. *Occup Med (Lond)* 2003;53:89-94.
- 3 Oyane NM, Pallesen S, Moen BE, Akerstedt T, Bjorvatn B. Associations between night work and anxiety, depression, insomnia, sleepiness and fatigue in a sample of Norwegian nurses. *PLoS ONE* 2013;8:e70228.
- 4 Eldevik MF, Flo E, Moen BE, Pallesen S, Bjorvatn B. Insomnia, excessive sleepiness, excessive fatigue, anxiety, depression and shift work disorder in nurses having less than 11 hours in-between shifts. *PLoS ONE* 2013;8:e70882.
- 5 Vedaa O, Pallesen S, Waage S et al. Short rest between shift intervals increases the risk of sick leave: a prospective registry study. *Occup Environ Med* 2017;74:496-501.
- 6 Flo E, Pallesen S, Moen BE, Waage S, Bjorvatn B. Short rest periods between work shifts predict sleep and health problems in nurses at 1-year follow-up. *Occup Environ Med* 2014;71:555-61.
- 7 Ferri P, Guadi M, Marcheselli L, Balduzzi S, Magnani D, Di Lorenzo R. The impact of shift work on the psychological and physical health of nurses in a general hospital: a comparison between rotating night shifts and day shifts. *Risk Manag Healthc Policy* 2016;9:203-211.



- 1  
2  
3 8 Di Milia L, Waage S, Pallesen S, Bjorvatn B. Shift work disorder in a random  
4 population sample--prevalence and comorbidities. *PLoS ONE* 2013;8:e55306.  
5 9 Wright KP, Jr., Bogan RK, Wyatt JK. Shift work and the assessment and management  
6 of shift work disorder (SWD). *Sleep Med Rev* 2013;17:41-54.  
7 10 Waage S, Pallesen S, Moen BE et al. Predictors of shift work disorder among nurses: a  
8 longitudinal study. *Sleep Med* 2014;15:1449-55.  
9 11 Waage S, Moen BE, Pallesen S et al. Shift work disorder among oil rig workers in the  
10 North Sea. *Sleep* 2009;32:558-65.  
11 12 Flo E, Pallesen S, Mageroy N et al. Shift work disorder in nurses--assessment,  
12 prevalence and related health problems. *PLoS ONE* 2012;7:e33981.  
13 13 Drake CL, Roehrs T, Richardson G, Walsh JK, Roth T. Shift work sleep disorder:  
14 prevalence and consequences beyond that of symptomatic day workers. *Sleep*  
15 2004;27:1453-62.  
16 14 Houle TT, Butschek RA, Turner DP, Smitherman TA, Rains JC, Penzien DB. Stress  
17 and sleep duration predict headache severity in chronic headache sufferers. *Pain*  
18 2012;153:2432-40.  
19 15 Kim J, Cho SJ, Kim WJ, Yang KI, Yun CH, Chu MK. Insufficient sleep is prevalent  
20 among migraineurs: a population-based study. *J Headache Pain* 2017;18:50.  
21 16 Jakobsen GS, Timm AM, Hansen AM, Garde AH, Nabe-Nielsen K. The association  
22 between shift work and treatment-seeking migraine in Denmark. *Ergonomics*  
23 2017;60:1207-1217.  
24 17 Alfredsson L, Akerstedt T, Mattsson M, Wilborg B. Self-reported health and well-  
25 being amongst night security guards: a comparison with the working population.  
26 *Ergonomics* 1991;34:525-30.  
27 18 Portela LF, Rotenberg L, Waissmann W. Self-reported health and sleep complaints  
28 among nursing personnel working under 12 h night and day shifts. *Chronobiol Int*  
29 2004;21:859-70.  
30 19 Jensen HI, Larsen JW, Thomsen TD. The impact of shift work on intensive care  
31 nurses' lives outside work: A cross-sectional study. *J Clin Nurs* 2018;27:e703-e709.  
32 20 Ho KH, Benjamin KC. Perceived headache associations in Singapore: results of a  
33 randomized national survey. *Headache* 2001;41:164-70.  
34 21 Molarius A, Tegelberg A, Ohrvik J. Socio-economic factors, lifestyle, and headache  
35 disorders - a population-based study in Sweden. *Headache* 2008;48:1426-37.  
36 22 Wang Y, Xie J, Yang F et al. The prevalence of primary headache disorders and their  
37 associated factors among nursing staff in North China. *J Headache Pain* 2015;16:4.  
38 23 Kuo WY, Huang CC, Weng SF et al. Higher migraine risk in healthcare professionals  
39 than in general population: a nationwide population-based cohort study in Taiwan. *J*  
40 *Headache Pain* 2015;16:102.  
41 24 Jensen R, Stovner LJ. Epidemiology and comorbidity of headache. *Lancet Neurol*  
42 2008;7:354-61.  
43 25 Linde M, Stovner LJ, Zwart JA, Hagen K. Time trends in the prevalence of headache  
44 disorders. The Nord-Trøndelag Health Studies (HUNT 2 and HUNT 3). *Cephalalgia*  
45 2011;31:585-96.  
46 26 Headache Classification Committee of the International Headache Society. The  
47 International Classification of Headache Disorders, 3rd edition (beta version).  
48 *Cephalalgia* 2013;33:629-808.  
49 27 Grande RB, Aaseth K, Gulbrandsen P, Lundqvist C, Russell MB. Prevalence of  
50 primary chronic headache in a population-based sample of 30- to 44-year-old persons.  
51 The Akershus study of chronic headache. *Neuroepidemiology* 2008;30:76-83.  
52  
53  
54  
55  
56  
57  
58  
59  
60



- 1  
2  
3 28 Diener HC, Holle D, Solbach K, Gaul C. Medication-overuse headache: risk factors,  
4 pathophysiology and management. *Nat Rev Neurol* 2016;12:575-83.  
5 29 Jonsson P, Hedenrud T, Linde M. Epidemiology of medication overuse headache in  
6 the general Swedish population. *Cephalalgia* 2011;31:1015-22.  
7 30 Bjorvatn B, Mageroy N, Moen BE, Pallesen S, Waage S. Parasomnias are more  
8 frequent in shift workers than in day workers. *Chronobiol Int* 2015;32:1352-8.  
9 31 Hagen K, Zwart JA, Aamodt AH et al. The validity of questionnaire-based diagnoses:  
10 the third Nord-Trondelag Health Study 2006-2008. *J Headache Pain* 2010;11:67-73.  
11 32 Hagen K, Zwart JA, Aamodt AH et al. A face-to-face interview of participants in  
12 HUNT 3: the impact of the screening question on headache prevalence. *J Headache  
13 Pain* 2008;9:289-94.  
14 33 American Academy of Sleep Medicine. *The international classification of sleep  
15 disorders, 2nd ed.: Diagnostic and coding manual*. Westchester, IL, 2005.  
16 34 Pallesen S, Bjorvatn B, Nordhus IH, Sivertsen B, Hjørnevik M, Morin CM. A new  
17 scale for measuring insomnia: the Bergen Insomnia Scale. *Perceptual and Motor  
18 Skills* 2008;107:691-706.  
19 35 American Psychiatric Association. *Diagnostic and statistical manual of mental  
20 disorders. Text revision (DSM-IV-TR)*. Washington, DC: American Psychiatric  
21 Association, 2000.  
22 36 American Psychiatric Association. *Diagnostic and Statistical Manual of Mental  
23 Disorders (DSM-5)*. Washington, DC: American Psychiatric Association, 2013.  
24 37 Odegard SS, Engstrom M, Sand T, Stovner LJ, Zwart JA, Hagen K. Associations  
25 between sleep disturbance and primary headaches: the third Nord-Trondelag Health  
26 Study. *J Headache Pain* 2010;11:197-206.  
27 38 Bjorvatn B, Pallesen S. A practical approach to circadian rhythm sleep disorders.  
29 *Sleep Med Rev* 2009;13:47-60.  
30 39 Sack RL, Auckley D, Auger RR et al. Circadian rhythm sleep disorders: part I, basic  
31 principles, shift work and jet lag disorders. An American Academy of Sleep Medicine  
32 review. *Sleep* 2007;30:1460-83.  
33 40 Knutsson A. Methodological aspects of shift-work research. *Chronobiol Int*  
34 2004;21:1037-47.  
35 41 Rains JC, Davis RE, Smitherman TA. Tension-type headache and sleep. *Curr Neurol  
36 Neurosci Rep* 2015;15:520.  
37 42 Engstrom M, Hagen K, Bjork M, Stovner LJ, Stjern M, Sand T. Sleep quality, arousal  
38 and pain thresholds in tension-type headache: a blinded controlled polysomnographic  
39 study. *Cephalalgia* 2014;34:455-63.  
40 43 Bendtsen L, Jensen R. Treating tension-type headache -- an expert opinion. *Expert  
41 Opin Pharmacother* 2011;12:1099-109.  
42 44 Tran DP, Spierings EL. Headache and insomnia: their relation reviewed. *Cranio*  
43 2013;31:165-70.  
44 45 Uhlig BL, Engstrom M, Odegard SS, Hagen KK, Sand T. Headache and insomnia in  
46 population-based epidemiological studies. *Cephalalgia* 2014;34:745-51.  
47 46 Rasmussen BK. Migraine and tension-type headache in a general population:  
48 precipitating factors, female hormones, sleep pattern and relation to lifestyle. *Pain*  
49 1993;53:65-72.  
50  
51  
52  
53  
54  
55  
56  
57  
58  
59  
60

Table 1. Characteristics of the Norwegian nurses in the study.

|                                                           |                  |
|-----------------------------------------------------------|------------------|
| Sex (n=1578): Female                                      | 90.5%            |
| Age in wave 1 (n=1583): mean (SD)                         | 32.5 (8.5) years |
| Percentage of full-time equivalent (n=1536):              |                  |
| <50%                                                      | 3.9%             |
| 50-75%                                                    | 20.3%            |
| 76-90%                                                    | 16.5%            |
| >90%                                                      | 59.2%            |
| Married/cohabiting (n=1582): Yes                          | 76.5%            |
| Children living at home (n=1578): Yes                     | 63.3%            |
| Work schedule (n=1532):                                   |                  |
| Day only                                                  | 19.3%            |
| Evening only                                              | 0.4              |
| Two-shift rotation                                        | 32.4%            |
| Night shift only                                          | 6.6%             |
| Three-shift rotation                                      | 36.9%            |
| Other schedules including night shifts                    | 4.4%             |
| Number of night shifts last year (n=1534):                |                  |
| 0 night shifts                                            | 39.8%            |
| 1-20 night shifts                                         | 26.1%            |
| >20 night shifts                                          | 34.0%            |
| Number of quick returns last year (n=1511):               |                  |
| 0 quick returns                                           | 22.6%            |
| 1-20 quick returns                                        | 25.2%            |
| >20 quick returns                                         | 52.2%            |
| Shift work disorder (n=1567): Yes                         | 27.3%            |
| Insomnia disorder (n=1585): Yes                           | 31.7%            |
| Headache last year (n=1579): Yes                          | 56.0%            |
| Frequent headache ( $\geq 1$ day per month) (n=1585): Yes | 48.1%            |
| Migraine (n=1537): Yes                                    | 19.6%            |
| Tension-type headache (n=1559): Yes                       | 27.9%            |
| Chronic headache (n=1577): Yes                            | 2.3%             |
| Medication-overuse headache (n=1579): Yes                 | 1.2%             |

SD, standard deviation. n, number of nurses.

Table 2. Prevalence of different types of headache complaints among Norwegian nurses.

|                                        | Frequent headache <sup>1</sup><br>% (n) | Migraine<br>% (n)               | Tension-type<br>headache % (n) | Chronic headache <sup>2</sup><br>% (n) | Medication-overuse<br>headache % (n) |
|----------------------------------------|-----------------------------------------|---------------------------------|--------------------------------|----------------------------------------|--------------------------------------|
| Work schedule (n=1415-1459):           | 0.2 <sup>a</sup> , p=.979               | 2.5 <sup>a</sup> , p=.472       | 3.5 <sup>a</sup> , p=.321      | 2.3 <sup>a</sup> , p=.510              | 1.7 <sup>a</sup> , p=.637            |
| Day only                               | 47.3 (140)                              | 22.6 (65)                       | 24.5 (71)                      | 1.7 (5)                                | 1.0 (3)                              |
| Two-shift rotation                     | 48.7 (242)                              | 20.3 (98)                       | 26.1 (129)                     | 3.2 (16)                               | 1.6 (8)                              |
| Night shift only                       | 47.5 (48)                               | 16.3 (16)                       | 29.0 (29)                      | 2.0 (2)                                | 2.0 (2)                              |
| Three-shift rotation                   | 47.6 (269)                              | 18.8 (103)                      | 29.9 (165)                     | 2.1 (12)                               | 0.9 (5)                              |
| Night shifts last year (n=1489-1534):  | 3.4 <sup>a</sup> , p=.180               | 3.3 <sup>a</sup> , p=.188       | <b>6.9<sup>a</sup>, p=.032</b> | 0.4 <sup>a</sup> , p=.813              | 1.1 <sup>a</sup> , p=.578            |
| 0 night shifts                         | 47.8 (292)                              | 21.9 (130)                      | 24.4 (147)                     | 2.6 (16)                               | 1.5 (9)                              |
| 1-20 night shifts                      | 44.6 (179)                              | 18.0 (70)                       | 30.0 (118)                     | 2.0 (8)                                | 0.8 (3)                              |
| >20 night shifts                       | 50.8 (265)                              | 18.1 (92)                       | 30.9 (159)                     | 2.3 (12)                               | 1.2 (6)                              |
| Quick returns last year (n=1465-1511): | 0.2 <sup>a</sup> , p=.902               | 1.5 <sup>a</sup> , p=.480       | 2.4 <sup>a</sup> , p=.296      | 0.2 <sup>a</sup> , p=.885              | 0.8 <sup>a</sup> , p=.666            |
| 0 quick returns                        | 47.4 (162)                              | 22.1 (73)                       | 24.8 (83)                      | 2.1 (7)                                | 1.2 (4)                              |
| 1-20 quick returns                     | 48.8 (186)                              | 18.9 (70)                       | 29.6 (111)                     | 2.4 (9)                                | 0.8 (3)                              |
| >20 quick returns                      | 48.7 (384)                              | 19.1 (146)                      | 28.8 (224)                     | 2.5 (20)                               | 1.4 (11)                             |
| Shift work disorder (n=1521-1567):     | <b>36.9<sup>a</sup>, p&lt;.0005</b>     | <b>11.3<sup>a</sup>, p=.001</b> | 1.6 <sup>a</sup> , p=.208      | <b>5.7<sup>a</sup>, p=.017</b>         | 0.5 <sup>a</sup> , p=.491            |
| No                                     | 43.4 (494)                              | 17.7 (197)                      | 26.9 (301)                     | 1.8 (20)                               | 1.1 (12)                             |
| Yes                                    | 60.7 (260)                              | 25.6 (104)                      | 30.2 (127)                     | 4.0 (17)                               | 1.6 (7)                              |
| Insomnia disorder (n=1537-1585):       | <b>25.1<sup>a</sup>, p&lt;.0005</b>     | <b>10.1<sup>a</sup>, p=.001</b> | 0.0 <sup>a</sup> , p=.983      | <b>9.7<sup>a</sup>, p=.002</b>         | <b>15.6<sup>a</sup>, p&lt;.0005</b>  |
| No                                     | 43.8 (474)                              | 17.4 (184)                      | 28.0 (297)                     | 1.5 (16)                               | 0.5 (5)                              |
| Yes                                    | 57.5 (289)                              | 24.5 (118)                      | 27.8 (138)                     | 4.2 (21)                               | 2.8 (14)                             |

<sup>1</sup>Headache  $\geq 1$  days per month. <sup>2</sup>Headache >14 days per month.

<sup>a</sup>Pearson Chi-square, with Yates' correction for continuity when used in a 2x2 table.

Significant findings are shown in **bold**.

Table 3. Separate adjusted logistic regression analyses with different headache types as the dependent variables among Norwegian nurses.

| Independent variables   | Frequent headache <sup>1</sup><br>OR (95% CI) <sup>a</sup><br>n=1439-1519 | Migraine<br>OR (95% CI) <sup>a</sup><br>n=1398-1476 | Tension-type headache<br>OR (95% CI) <sup>a</sup><br>n=1416-1495 | Chronic headache <sup>2</sup><br>OR (95% CI) <sup>a</sup><br>n=1432-1512 | Medication-overuse<br>headache OR (95% CI) <sup>a</sup><br>n=1434-1514 |
|-------------------------|---------------------------------------------------------------------------|-----------------------------------------------------|------------------------------------------------------------------|--------------------------------------------------------------------------|------------------------------------------------------------------------|
| Work schedule           |                                                                           |                                                     |                                                                  |                                                                          |                                                                        |
| Day only                | 1.00                                                                      | 1.00                                                | 1.00                                                             | 1.00                                                                     | 1.00                                                                   |
| Two-shift               | 1.07 (0.80-1.44)                                                          | 0.89 (0.62-1.28)                                    | 1.11 (0.79-1.57)                                                 | 1.91 (0.68-5.32)                                                         | 1.49 (0.39-5.80)                                                       |
| Night only              | 1.07 (0.65-1.77)                                                          | 0.75 (0.39-1.44)                                    | 1.30 (0.74-2.28)                                                 | 1.18 (0.20-6.88)                                                         | 2.39 (0.32-17.65)                                                      |
| Three-shift             | 1.01 (0.76-1.35)                                                          | 0.79 (0.55-1.14)                                    | 1.31 (0.94-1.83)                                                 | 1.22 (0.42-3.56)                                                         | 0.86 (0.20-3.70)                                                       |
| Number of night shifts  |                                                                           |                                                     |                                                                  |                                                                          |                                                                        |
| 0 night shifts          | 1.00                                                                      | 1.00                                                | 1.00                                                             | 1.00                                                                     | 1.00                                                                   |
| 1-20 night shifts       | 0.86 (0.66-1.11)                                                          | 0.78 (0.56-1.09)                                    | 1.27 (0.95-1.70)                                                 | 0.73 (0.30-1.74)                                                         | 0.51 (0.14-1.95)                                                       |
| >20 night shifts        | 1.15 (0.90-1.47)                                                          | 0.80 (0.58-1.09)                                    | <b>1.41 (1.07-1.86)</b>                                          | 0.82 (0.38-1.80)                                                         | 0.78 (0.27-2.29)                                                       |
| Number of quick returns |                                                                           |                                                     |                                                                  |                                                                          |                                                                        |
| 0 quick returns         | 1.00                                                                      | 1.00                                                | 1.00                                                             | 1.00                                                                     | 1.00                                                                   |
| 1-20 quick returns      | 1.09 (0.81-1.46)                                                          | 0.83 (0.57-1.21)                                    | 1.30 (0.92-1.82)                                                 | 1.12 (0.41-3.05)                                                         | 0.66 (0.15-3.01)                                                       |
| >20 quick returns       | 1.06 (0.82-1.39)                                                          | 0.81 (0.58-1.12)                                    | 1.23 (0.91-1.67)                                                 | 1.21 (0.50-2.95)                                                         | 1.18 (0.37-3.83)                                                       |
| Shift work disorder     |                                                                           |                                                     |                                                                  |                                                                          |                                                                        |
| No                      | 1.00                                                                      | 1.00                                                | 1.00                                                             | 1.00                                                                     | 1.00                                                                   |
| Yes                     | <b>2.04 (1.62-2.59)</b>                                                   | <b>1.60 (1.21-2.12)</b>                             | 1.19 (0.92-1.54)                                                 | <b>2.45 (1.25-4.80)</b>                                                  | 1.67 (0.64-4.40)                                                       |
| Insomnia disorder       |                                                                           |                                                     |                                                                  |                                                                          |                                                                        |
| No                      | 1.00                                                                      | 1.00                                                | 1.00                                                             | 1.00                                                                     | 1.00                                                                   |
| Yes                     | <b>1.79 (1.43-2.23)</b>                                                   | <b>1.55 (1.18-2.02)</b>                             | 1.01 (0.79-1.29)                                                 | <b>3.03 (1.54-5.95)</b>                                                  | <b>7.62 (2.48-23.41)</b>                                               |

<sup>1</sup>Headache  $\geq 1$  days per month. <sup>2</sup>Headache  $> 14$  days per month.

<sup>a</sup>Separate logistic regression analyses for each independent variable with adjustment for sex, age, percentage of full-time equivalent, marital status, and children living at home.

Significant findings are shown in **bold**.

## STROBE Statement—checklist of items that should be included in reports of observational studies

|                              | Item No | Recommendation                                                                                                                                                                                                                                                                                                                                                                                                                                                         |
|------------------------------|---------|------------------------------------------------------------------------------------------------------------------------------------------------------------------------------------------------------------------------------------------------------------------------------------------------------------------------------------------------------------------------------------------------------------------------------------------------------------------------|
| <b>Title and abstract</b>    | 1       | (a) Indicate the study's design with a commonly used term in the title or the abstract<br>(b) Provide in the abstract an informative and balanced summary of what was done and what was found                                                                                                                                                                                                                                                                          |
| See page 1 and 3             |         |                                                                                                                                                                                                                                                                                                                                                                                                                                                                        |
| <b>Introduction</b>          |         |                                                                                                                                                                                                                                                                                                                                                                                                                                                                        |
| Background/rationale         | 2       | Explain the scientific background and rationale for the investigation being reported                                                                                                                                                                                                                                                                                                                                                                                   |
| See page 5 and 6             |         |                                                                                                                                                                                                                                                                                                                                                                                                                                                                        |
| Objectives                   | 3       | State specific objectives, including any prespecified hypotheses                                                                                                                                                                                                                                                                                                                                                                                                       |
| See page 6                   |         |                                                                                                                                                                                                                                                                                                                                                                                                                                                                        |
| <b>Methods</b>               |         |                                                                                                                                                                                                                                                                                                                                                                                                                                                                        |
| Study design                 | 4       | Present key elements of study design early in the paper                                                                                                                                                                                                                                                                                                                                                                                                                |
| See page 6 and 7             |         |                                                                                                                                                                                                                                                                                                                                                                                                                                                                        |
| Setting                      | 5       | Describe the setting, locations, and relevant dates, including periods of recruitment, exposure, follow-up, and data collection                                                                                                                                                                                                                                                                                                                                        |
| See page 6 and 7             |         |                                                                                                                                                                                                                                                                                                                                                                                                                                                                        |
| Participants                 | 6       | (a) <i>Cohort study</i> —Give the eligibility criteria, and the sources and methods of selection of participants. Describe methods of follow-up<br><i>Case-control study</i> —Give the eligibility criteria, and the sources and methods of case ascertainment and control selection. Give the rationale for the choice of cases and controls<br><i>Cross-sectional study</i> —Give the eligibility criteria, and the sources and methods of selection of participants |
| See page 6                   |         |                                                                                                                                                                                                                                                                                                                                                                                                                                                                        |
| Variables                    | 7       | Clearly define all outcomes, exposures, predictors, potential confounders, and effect modifiers. Give diagnostic criteria, if applicable                                                                                                                                                                                                                                                                                                                               |
| See page 7 and 8             |         |                                                                                                                                                                                                                                                                                                                                                                                                                                                                        |
| Data sources/<br>measurement | 8*      | For each variable of interest, give sources of data and details of methods of assessment (measurement). Describe comparability of assessment methods if there is more than one group                                                                                                                                                                                                                                                                                   |
| See page 6, 7 and 8          |         |                                                                                                                                                                                                                                                                                                                                                                                                                                                                        |
| Bias                         | 9       | Describe any efforts to address potential sources of bias                                                                                                                                                                                                                                                                                                                                                                                                              |
| See page 12                  |         |                                                                                                                                                                                                                                                                                                                                                                                                                                                                        |
| Study size                   | 10      | Explain how the study size was arrived at                                                                                                                                                                                                                                                                                                                                                                                                                              |
| See page 6                   |         |                                                                                                                                                                                                                                                                                                                                                                                                                                                                        |
| Quantitative variables       | 11      | Explain how quantitative variables were handled in the analyses. If applicable, describe which groupings were chosen and why                                                                                                                                                                                                                                                                                                                                           |
| See page 8                   |         |                                                                                                                                                                                                                                                                                                                                                                                                                                                                        |
| Statistical methods          | 12      | (a) Describe all statistical methods, including those used to control for confounding<br>(b) Describe any methods used to examine subgroups and interactions                                                                                                                                                                                                                                                                                                           |

(c) Explain how missing data were addressed

(d) *Cohort study*—If applicable, explain how loss to follow-up was addressed

*Case-control study*—If applicable, explain how matching of cases and controls was addressed

*Cross-sectional study*—If applicable, describe analytical methods taking account of sampling strategy

(e) Describe any sensitivity analyses

See page 8 and 9

## Results

|              |     |                                                                                                                                                                                                   |
|--------------|-----|---------------------------------------------------------------------------------------------------------------------------------------------------------------------------------------------------|
| Participants | 13* | (a) Report numbers of individuals at each stage of study—eg numbers potentially eligible, examined for eligibility, confirmed eligible, included in the study, completing follow-up, and analysed |
|              |     | (b) Give reasons for non-participation at each stage                                                                                                                                              |
|              |     | (c) Consider use of a flow diagram                                                                                                                                                                |

See page 9

|                  |     |                                                                                                                                          |
|------------------|-----|------------------------------------------------------------------------------------------------------------------------------------------|
| Descriptive data | 14* | (a) Give characteristics of study participants (eg demographic, clinical, social) and information on exposures and potential confounders |
|                  |     | (b) Indicate number of participants with missing data for each variable of interest                                                      |
|                  |     | (c) <i>Cohort study</i> —Summarise follow-up time (eg, average and total amount)                                                         |

Page 9 and 17

|              |     |                                                                                                      |
|--------------|-----|------------------------------------------------------------------------------------------------------|
| Outcome data | 15* | <i>Cohort study</i> —Report numbers of outcome events or summary measures over time                  |
|              |     | <i>Case-control study</i> —Report numbers in each exposure category, or summary measures of exposure |
|              |     | <i>Cross-sectional study</i> —Report numbers of outcome events or summary measures                   |

Page 9 and 10

|              |    |                                                                                                                                                                                                              |
|--------------|----|--------------------------------------------------------------------------------------------------------------------------------------------------------------------------------------------------------------|
| Main results | 16 | (a) Give unadjusted estimates and, if applicable, confounder-adjusted estimates and their precision (eg, 95% confidence interval). Make clear which confounders were adjusted for and why they were included |
|              |    | (b) Report category boundaries when continuous variables were categorized                                                                                                                                    |
|              |    | (c) If relevant, consider translating estimates of relative risk into absolute risk for a meaningful time period                                                                                             |

Page 18 and 19

|                |    |                                                                                                |
|----------------|----|------------------------------------------------------------------------------------------------|
| Other analyses | 17 | Report other analyses done—eg analyses of subgroups and interactions, and sensitivity analyses |
|----------------|----|------------------------------------------------------------------------------------------------|

Page 18 and 19

## Discussion

|             |    |                                                          |
|-------------|----|----------------------------------------------------------|
| Key results | 18 | Summarise key results with reference to study objectives |
|-------------|----|----------------------------------------------------------|

Page 10

|             |    |                                                                                                                                                            |
|-------------|----|------------------------------------------------------------------------------------------------------------------------------------------------------------|
| Limitations | 19 | Discuss limitations of the study, taking into account sources of potential bias or imprecision. Discuss both direction and magnitude of any potential bias |
|-------------|----|------------------------------------------------------------------------------------------------------------------------------------------------------------|

Page 12

|                |    |                                                                                                                                                                            |
|----------------|----|----------------------------------------------------------------------------------------------------------------------------------------------------------------------------|
| Interpretation | 20 | Give a cautious overall interpretation of results considering objectives, limitations, multiplicity of analyses, results from similar studies, and other relevant evidence |
|----------------|----|----------------------------------------------------------------------------------------------------------------------------------------------------------------------------|

Page 10-12

|                  |    |                                                                       |
|------------------|----|-----------------------------------------------------------------------|
| Generalisability | 21 | Discuss the generalisability (external validity) of the study results |
|------------------|----|-----------------------------------------------------------------------|

Page 12

**Other information**

---

Funding 22 Give the source of funding and the role of the funders for the present study and, if applicable, for the original study on which the present article is based

Page 13

\*Give information separately for cases and controls in case-control studies and, if applicable, for exposed and unexposed groups in cohort and cross-sectional studies.

**Note:** An Explanation and Elaboration article discusses each checklist item and gives methodological background and published examples of transparent reporting. The STROBE checklist is best used in conjunction with this article (freely available on the Web sites of PLoS Medicine at <http://www.plosmedicine.org/>, Annals of Internal Medicine at <http://www.annals.org/>, and Epidemiology at <http://www.epidem.com/>). Information on the STROBE Initiative is available at [www.strobe-statement.org](http://www.strobe-statement.org).

# BMJ Open

## Migraine, tension-type headache and medication-overuse headache in a large population of shift working nurses - a cross-sectional study in Norway

|                                 |                                                                                                                                                                                                                                                                                                                                                                                                                                                                                                                                                                                                                                                                                                                                                                                                                                           |
|---------------------------------|-------------------------------------------------------------------------------------------------------------------------------------------------------------------------------------------------------------------------------------------------------------------------------------------------------------------------------------------------------------------------------------------------------------------------------------------------------------------------------------------------------------------------------------------------------------------------------------------------------------------------------------------------------------------------------------------------------------------------------------------------------------------------------------------------------------------------------------------|
| Journal:                        | <i>BMJ Open</i>                                                                                                                                                                                                                                                                                                                                                                                                                                                                                                                                                                                                                                                                                                                                                                                                                           |
| Manuscript ID                   | bmjopen-2018-022403.R2                                                                                                                                                                                                                                                                                                                                                                                                                                                                                                                                                                                                                                                                                                                                                                                                                    |
| Article Type:                   | Research                                                                                                                                                                                                                                                                                                                                                                                                                                                                                                                                                                                                                                                                                                                                                                                                                                  |
| Date Submitted by the Author:   | 22-Aug-2018                                                                                                                                                                                                                                                                                                                                                                                                                                                                                                                                                                                                                                                                                                                                                                                                                               |
| Complete List of Authors:       | Bjorvatn, Bjørn; Universitetet i Bergen Det medisinsk-odontologiske fakultet, Department of Global Public Health and Primary Care; Haukeland Universitetssjukehus, Norwegian Competence Center for Sleep Disorders<br>Pallesen, Ståle; Universitetet i Bergen, Department of Psychosocial Science, Bergen, Norway; Haukeland Universitetssjukehus, Norwegian Competence Center for Sleep Disorders<br>Moen, Bente; Universitetet i Bergen Det medisinsk-odontologiske fakultet, Department of Global Public Health and Primary Care<br>Waage, Siri; Universitetet i Bergen Det medisinsk-odontologiske fakultet, Department of Global Public Health and Primary Care; Haukeland Universitetssjukehus, Norwegian Competence Center for Sleep Disorders<br>Kristoffersen, Espen Saxhaug; University of Oslo, Department of General Practice |
| <b>Primary Subject Heading</b>: | Occupational and environmental medicine                                                                                                                                                                                                                                                                                                                                                                                                                                                                                                                                                                                                                                                                                                                                                                                                   |
| Secondary Subject Heading:      | Neurology, Epidemiology                                                                                                                                                                                                                                                                                                                                                                                                                                                                                                                                                                                                                                                                                                                                                                                                                   |
| Keywords:                       | chronic headache, insomnia, shift work disorder, night work, quick returns                                                                                                                                                                                                                                                                                                                                                                                                                                                                                                                                                                                                                                                                                                                                                                |
|                                 |                                                                                                                                                                                                                                                                                                                                                                                                                                                                                                                                                                                                                                                                                                                                                                                                                                           |

SCHOLARONE™  
Manuscripts



1  
2  
3 **Migraine, tension-type headache and medication-overuse headache in a**  
4 **large population of shift working nurses – a cross-sectional study in Norway**  
5  
6  
7

8 Bjørn Bjorvatn MD PhD<sup>1,2</sup>, Ståle Pallesen PhD<sup>2,3</sup>, Bente E. Moen MD PhD<sup>1</sup>, Siri Waage  
9 PhD<sup>1,2</sup>, Espen S. Kristoffersen MD PhD<sup>4</sup>  
10  
11

12  
13 <sup>1</sup> Department of Global Public Health and Primary Care, University of Bergen, Norway.

14 <sup>2</sup> Norwegian Competence Center for Sleep Disorders, Haukeland University Hospital,  
15 Norway.  
16

17 <sup>3</sup> Department of Psychosocial Science, University of Bergen, Norway.  
18

19 <sup>4</sup> Department of General Practice, University of Oslo, Norway.  
20  
21  
22  
23

24 Corresponding author:

25 Bjørn Bjorvatn

26 Department of Global Public Health and Primary Care

27 University of Bergen

28 Kalfarveien 31, N-5018 Bergen

29 Norway

30 Phone: +4755586088

31 Fax: +4755586130

32 Email: [bjorn.bjorvatn@uib.no](mailto:bjorn.bjorvatn@uib.no)  
33  
34  
35  
36  
37  
38  
39  
40  
41  
42  
43  
44  
45  
46  
47  
48  
49  
50  
51  
52  
53  
54  
55  
56  
57  
58  
59  
60

## ABSTRACT

### Objectives

To investigate associations between different types of headache and shift work.

### Design, participants and outcome measures

Nurses with different work schedules (day work, two-shift rotation, night work, three-shift rotation) participated in a cohort study with annual surveys that started in 2008/2009. In 2014 (wave 6), a comprehensive headache instrument was included in the survey, in which 1585 nurses participated. Headaches were assessed according to the International Classification of Headache Disorders IIIb. Frequent headache ( $\geq 1$  day per month), migraine, tension-type headache, chronic headache (headache  $> 14$  days per month), and medication-overuse headache (chronic headache + acute headache medication  $\geq 10$  days last month) comprised the dependent variables. Adjusted (for sex, age, percentage of full-time equivalent, marital status, children living at home) logistic regression analyses were conducted with work schedule, number of night shifts worked last year, number of quick returns ( $< 11$  hours in-between shifts) last year, shift work disorder, and insomnia disorder as predictors.

### Results

Frequent headache, migraine, and chronic headache were associated with shift work disorder (OR 2.04, 95% CI 1.62-2.59; 1.60, 1.21-2.12; 2.45, 1.25-4.80, respectively) and insomnia disorder (OR 1.79, 95% CI 1.43-2.23; 1.55, 1.18-2.02; 3.03, 1.54-5.95, respectively), but not with work schedule, number of night shifts or number of quick returns. Tension-type headache was only associated with  $> 20$  night shifts last year (OR 1.41, 95% CI 1.07-1.86). Medication-overuse headache was only associated with insomnia disorder (OR 7.62, 95% CI 2.48-23.41).

### Conclusions

We did not find any association between different types of headache and work schedule. However, tension-type headache was associated with high number of night shifts. Nurses with sleep disorders (insomnia disorder and shift work disorder) reported higher prevalence of frequent headache, migraine, chronic headache and medication-overuse headache (only insomnia) compared to nurses not having insomnia disorder and shift work disorder, respectively.

**Keywords:** chronic headache, insomnia, shift work disorder, night work, quick returns

**Strengths and limitations of this study**

- A large and homogeneous sample of nurses with different work schedules
- Validated questionnaires for diagnosing different types of headache and sleep disorders
- No clinical interviews by physicians
- Few nurses with some of the headache subtypes which limits statistical power in these analyses
- No conclusions about causality due to the cross-sectional design

## INTRODUCTION

Shift work is associated with impaired health, and several studies show that working shifts increase the risk of sleep disturbances, cardiovascular disease, metabolic disorders, and cancer.<sup>1</sup> Sleep disturbances are considered to be the most common complaints, especially among rotating shift workers and night workers.<sup>2,3</sup> Night workers are on duty during their biological resting phase and are enforced to schedule sleep to their biological active phase. This has been proposed as a causative factor for sleep and health problems.<sup>1</sup> Accordingly, studies suggest that the number of night shifts per year and the number of quick returns (defined as shifts with less than 11 hours in-between) per year are associated with increased risk of health complaints and sick leave.<sup>4-7</sup>

Recently, the focus on shift workers fulfilling the criteria for shift work disorder (SWD) has been intensified.<sup>8-10</sup> SWD is characterized by complaints of sleep problems and excessive sleepiness caused by work schedules overlapping with the habitual time for sleep.<sup>8,11</sup> This disorder affects 4.8-44.3% of nurses depending on type of work schedule.<sup>12</sup> SWD has been associated with impaired health, e.g. depression and hypertension.<sup>8,10,12,13</sup>

Few studies have specifically investigated the association between shift work and the presence and severity of headache. This is somewhat surprising, considering the association between sleep and headache.<sup>14-16</sup> Many of the existing studies suffer from methodological limitations, such as low number of participants (<300)<sup>17-19</sup> and not using validated headache questions.<sup>17-21</sup> One study from China reported that greater number of night shifts is positively associated with prevalence of headache,<sup>22</sup> and another study from Taiwan suggested that shift work increases the risk of migraine.<sup>23</sup> A Scandinavian study found an association between evening work, but not night work, and migraine.<sup>16</sup> The relationship between sleep and headache seems to be bidirectional. Lack of sleep can trigger headache, but sleep may also alleviate headache.<sup>15</sup> Disturbed sleep due to shift work is therefore likely to increase the risk of headache. The most common primary headaches in the general population are migraine and tension-type headache.<sup>24</sup> Most studies have focused on migraine and shift work,<sup>15,16</sup> although tension-type headache (TTH) is considered the most common form of headache with an estimated worldwide prevalence of approximately 40%.<sup>24</sup> The prevalence of migraine in the general population is 10-16%.<sup>24,25</sup> Chronic headache is defined as headache occurring more than 14 days per month and is present in 2-4% of the general population.<sup>24-27</sup> Medication-overuse headache (MOH) is a condition characterized by chronic headache and overuse of

1  
2  
3 acute headache medications, usually defined as intake of acute pain or migraine medications  
4 10 or more days per month.<sup>26 28</sup> The prevalence of medication-overuse headache in the  
5 general population is 1-2%, with more females being afflicted than males.<sup>28 29</sup>  
6  
7

8  
9 As headache is common in the general population and since sleep loss, that often occurs  
10 concomitant with shift work, may trigger headache, we aimed to investigate whether different  
11 types of headache (i.e. migraine, TTH, chronic headache, MOH) were related to work  
12 schedules, number of night shifts, number of quick returns, SWD, and insomnia disorder.  
13  
14 Nurses comprise a large population of shift workers and are thereby suitable for such studies.  
15 We hypothesized that nurses involved in night and shift work would report a higher  
16 prevalence of headaches compared to day workers.  
17  
18  
19  
20  
21  
22  
23

## 24 **METHODS**

### 25 **Procedure and participants**

26 The data stemmed from the ongoing longitudinal cohort study “SURvey of Shift work, Sleep  
27 and Health (SUSSH)” among Norwegian nurses. The first data collection was conducted  
28 during winter 2008/2009 (wave 1) when a sample of 5400 nurses was randomly selected from  
29 the Norwegian Nurses Organisation’s (NNO) membership roll and invited to participate. A  
30 total of 2059 (response rate = 38.1%) nurses completed the questionnaire at the first wave. In  
31 order to increase the study population, an additional sample of 906 newly educated nurses  
32 (response rate = 33.1%) was recruited in 2009. The total sample in wave 1 therefore included  
33 2965 nurses, see details in Bjorvatn et al.<sup>30</sup> The nurses who responded to the first wave have  
34 been invited to participate in annual follow-ups by receiving questionnaires sent by postal  
35 mail with pre-paid envelopes for returning the completed forms. Up to two reminders were  
36 sent to nurses who did not respond. The nurses who returned the questionnaire took part in a  
37 lottery, in which 25 individuals won a gift card with a value of 500 NOK (~ 60 US \$). The  
38 present study reports findings based on data from the sixth (2014) wave, in which the  
39 headache questionnaire was included. A total of 1991 out of 2869 eligible nurses completed  
40 the questionnaire at wave 6, yielding a response rate of 69.4%. Nurses that reported that they  
41 were no longer working as nurses at wave 6 were excluded from the analyses, leaving a total  
42 study population of 1585 nurses.  
43  
44  
45  
46  
47  
48  
49  
50  
51  
52  
53

### 54 **Demographics and work-related factors**

1  
2  
3 The demographic variables were assessed in wave 6, except for age and sex that were  
4 registered in wave 1. The nurses responded to questions about marital status  
5 (married/cohabiting; yes/no), children living at home (yes/no), percentage of full-time  
6 equivalent (<50%, 50-75%, 76-90%, >90% position), work schedule (day only, evening only,  
7 two-shift rotation (day and evening), night only, three-shift rotation (day, evening and night),  
8 and other schedules including night work), number of night shifts worked last year, and  
9 number of quick returns (defined as less than 11 hours between consecutive work shifts)  
10 worked last year. Few nurses worked “evening only” (n=6) and “other schedules including  
11 night shifts” (n=67), and these shifts were therefore excluded in the analysis of the association  
12 between work schedule and headache.  
13  
14  
15  
16  
17  
18  
19

## 20 Headache

21  
22 The comprehensive headache questionnaire was designed to determine whether the nurses  
23 suffered from headache, and fulfilled the International Classification of Headache Disorders  
24 (ICHD) IIIb criteria for migraine, tension-type headache (TTH) and medication-overuse  
25 headache (MOH).<sup>26</sup> The nurses were first screened: “Have you suffered from headache during  
26 the last year?”, and only nurses who answered “yes” were asked to respond to the other  
27 headache items. The screening positive headache sufferers were asked to report frequency,  
28 attack duration, intensity and accompanying headache symptoms to classify migraine and  
29 TTH, accordingly. The diagnoses of migraine and TTH were mutually exclusive. Frequent  
30 headache was defined as headache  $\geq 1$  day per month, and chronic headache was defined as  
31 headache >14 days per month, independently of the underlying subtype of headache. MOH  
32 was defined as chronic headache and intake of acute headache medication  $\geq 10$  days last  
33 month. The questionnaire-based headache diagnoses used here have previously been validated  
34 in a large unselected general population sample.<sup>25 31 32</sup>  
35  
36  
37  
38  
39  
40  
41  
42  
43  
44

## 45 Shift work disorder (SWD)

46 SWD was measured with three previous used questions<sup>11 12</sup> based on the minimal criteria  
47 listed in the second edition of the International Classification of Sleep Disorders (ICSD-2).<sup>33</sup>  
48 The questions were: a) Do you experience either difficulties sleeping or experience excessive  
49 sleepiness? (yes/no), b) Is the sleep or sleepiness problem related to a work schedule that  
50 makes you work when you normally would sleep? (yes/no), c) Have you had this sleep or  
51 sleepiness problem related to the work schedule for at least one month? (yes/no). Participants  
52 were classified as having SWD if they endorsed all three questions.  
53  
54  
55  
56  
57

## Insomnia disorder

Insomnia symptoms were evaluated with Bergen Insomnia Scale (BIS).<sup>34</sup> The BIS consists of six items, and was developed based on the diagnostic criteria for insomnia according to 4<sup>th</sup> and text revision version of the Diagnostic and Statistical Manual for Mental Disorders (DSM-IV-TR).<sup>35</sup> The items are scored along an eight-point scale indicating the number of days per week for which a specific insomnia symptom is experienced (0-7 days). The items refer to sleep onset (sleep latency exceeding 30 minutes), wake after sleep onset (more than 30 minutes), early morning awakening (more than 30 minutes), non-restorative sleep, daytime impairment, and dissatisfaction with sleep. The time frame is insomnia symptoms experienced during the past month. According to DSM-5 criteria,<sup>36</sup> insomnia disorder is defined as scoring 3 days per week or more on at least one of the first three items as well as 3 days per week or more on at least one of the latter two items. Missing responses to any of the insomnia questions were treated as not reporting that specific insomnia symptom. The scale has acceptable test-retest reliability, and good convergent and discriminative validity in relation to other self-report measures as well as to polysomnographic data.<sup>34</sup> Cronbach's alpha for the BIS was 0.83 in the present sample.

## Ethics

The study was approved by the Regional Committee for Medical and Health Research Ethics of Western Norway (REK-West, no 088.08). Written informed consent was obtained from all participants.

## Patient and public involvement

The questionnaire was developed by a group of researchers experienced with shift work and shift work related problems. The participating nurses were not involved in the design, recruitment or conduct of the study. The results will be disseminated to the study participants in the yearly report we send to the journal of the Norwegian nurses. Here we address last year's published data from the cohort study. In addition, the results will appear on a designated website – [www.sussh.no](http://www.sussh.no) (after publication).

## Statistics

The statistical analyses were conducted with IBM SPSS Statistics 23 for Windows. The prevalence of frequent headache, migraine, TTH, chronic headache, and MOH in relation to

1  
2  
3 the different work schedules, categories of night shifts and quick returns last year, SWD and  
4 insomnia disorder were explored by the Pearson chi-square tests (with Yates' correction for  
5 continuity when used in a 2 x 2 table). In addition, separate adjusted (with sex, age,  
6 percentage of full-time equivalent, marital status, children living at home as co-variables)  
7 logistic regression analyses were performed to assess different headaches (frequent headache,  
8 migraine, TTH, chronic headache, MOH) as dependent variables with work schedule (day  
9 only as a reference, compared to two-shift rotation, night only and three-shift rotation),  
10 number of night shifts last year (0, 1-20, >20 night shifts), number of quick returns last year  
11 (0, 1-20, >20 quick returns), SWD, and insomnia disorder as predictors. Significance level  
12 was set to .05.  
13  
14  
15  
16  
17  
18  
19  
20  
21

## 22 RESULTS

23 Demographic characteristics are presented in Table 1. Most of the nurses were females  
24 (90.5%) and mean age in wave 1 was 32.5 years (SD=8.5). Three-shift and two-shift rotation  
25 were the most common work schedules (Table 1). Mean number of night shifts last year was  
26 23.5 (SD=36.7) and mean number of quick returns last year was 33.4 (SD=35.4). Shift work  
27 disorder and insomnia disorder were present in 27.3% and 31.7% of the nurses, respectively.  
28 In total, 56.0% of the nurses (n=885) reported headache complaints during the last year, and  
29 48.1% (n=763) frequent headache ( $\geq 1$  day per month). Migraine, TTH, chronic headache, and  
30 MOH were present in 19.6% (n=302), 27.9% (n=435), 2.3% (n=37), and 1.2% (n=19) of the  
31 total sample of nurses, respectively (Table 1).  
32  
33  
34  
35  
36  
37  
38  
39

40 We did not find any significant differences between the prevalence of frequent headache,  
41 migraine, TTH, chronic headache or MOH across work schedules (Table 2). Similarly,  
42 logistic regression analyses with adjustment for sex, age, percentage of full-time equivalent,  
43 marital status, and children living at home, revealed no association between the different  
44 headache types and work schedule (Table 3).  
45  
46  
47  
48  
49

50 The prevalence of TTH was higher in nurses working night shifts last year compared to those  
51 not working night shifts, but we found no association between frequent headache, migraine,  
52 chronic headache or MOH and number of night shifts last year (Table 2). Similarly, in the  
53 adjusted logistic regression analysis, TTH was significantly associated with >20 night shifts  
54  
55  
56  
57



1  
2  
3 last year (OR 1.41, 95% CI 1.07-1.86) (Table 3). There were no associations between the  
4 different headache types and number of quick returns last year (Tables 2 and 3).  
5  
6

7  
8 The prevalence of frequent headache, migraine, and chronic headache were all clearly higher  
9 among nurses with SWD compared to nurses without SWD (Table 2). Furthermore, adjusted  
10 logistic regression analyses revealed that frequent headache, migraine, and chronic headache  
11 all were significantly associated with SWD, with odd ratios 2.04, 95% CI 1.62-2.59; 1.60,  
12 1.21-2.12; 2.45, 1.25-4.80, respectively (Table 3). TTH and MOH were not significantly  
13 associated with SWD (Tables 2 and 3).  
14  
15  
16  
17  
18

19 The prevalence of frequent headache, migraine, chronic headache, and MOH were all clearly  
20 higher among nurses with insomnia disorder compared to nurses without insomnia disorder  
21 (Table 2). These findings were also present in the adjusted logistic regression analyses, with  
22 OR 1.79, 95% CI 1.43-2.23; 1.55, 1.18-2.02; 3.03, 1.54-5.95, 7.62, 2.48-23.41, respectively  
23 (Table 3). The only headache type that was not associated with insomnia disorder was TTH  
24 (Tables 2 and 3).  
25  
26  
27  
28  
29  
30  
31

## 32 **DISCUSSION**

33 The present study showed that nurses with different work schedules reported similar  
34 prevalence of frequent headache, migraine, TTH, chronic headache, and MOH. These  
35 findings did thus not support our hypothesis that shift working nurses would report higher  
36 prevalence of headaches than day workers. However, nurses with high number of night shifts  
37 during the last year reported higher prevalence of TTH than nurses with no night shifts.  
38 Furthermore, nurses with SWD and insomnia disorder reported higher prevalence of most  
39 types of headache compared to nurses without SWD and insomnia disorder, respectively.  
40  
41  
42  
43  
44  
45

46 We hypothesized that night and shift work would be associated with higher prevalence of  
47 headaches. This was based on the well-known association between lack of sleep and  
48 headache.<sup>15 37</sup> It is well known that both rotating shift work schedules and night work  
49 normally will cause circadian rhythm misalignment and sleep deprivation.<sup>9 38 39</sup> In line with  
50 this, a Chinese study showed that number of night shifts was positively associated with  
51 prevalence of different types of headache.<sup>22</sup> However, a recent Danish study did not find any  
52 association between treatment-seeking migraine and night work or variable working hours.<sup>16</sup>  
53  
54  
55  
56  
57  
58  
59  
60

1  
2  
3 In the latter study, only fixed evening work was found to be associated (positively) with  
4 migraine. One possible explanation for the lack of association between headaches and work  
5 schedules in the present study may be the “healthy shift worker effect”. This is based on the  
6 assumption that shift workers have better health than those who avoid or quit shift work.<sup>40</sup>  
7 Hence, nurses with headaches may be more reluctant to work shifts or quit shift work more  
8 frequently than others, leading to underestimates of the possible negative effects of shift work  
9 in studies like the present one.  
10  
11  
12  
13  
14

15  
16 Similarly, the number of night shifts worked the last year was not associated with frequent  
17 headache, migraine, chronic headache, or MOH. However, TTH was associated with high  
18 number of night shifts. This finding suggests that there may be different sleep-headache  
19 mechanisms in TTH than in e.g. migraine.<sup>41</sup> In line with this, a polysomnography study found  
20 that TTH patients need more sleep than healthy controls, and that inadequate sleep may  
21 contribute to increased pain sensitivity in TTH.<sup>42</sup> Furthermore, a high number of night shifts  
22 may not necessarily only cause sleep deprivation, but may also be experienced as stressful and  
23 thereby precipitate TTH. High work stress is a risk factor for primary headaches, especially  
24 tension-type headache.<sup>22 43</sup> Whether circadian misalignment in itself (often occurring among  
25 shift and night workers) triggers headaches is not known, and this topic should receive more  
26 attention in the future.  
27  
28  
29  
30  
31  
32  
33  
34

35  
36 Many Norwegian nurses with rotating shift schedules have quick returns (defined as shifts  
37 separated by less than 11 hours) in their roster. For the nurses, most quick returns involve  
38 working an evening shift followed by a day shift. Such short rest in-between shifts typically  
39 cause sleep deprivation and health problems.<sup>4 5</sup> However, we found no association between  
40 headaches and quick returns. This was surprising, and may suggest that short-term sleep  
41 deprivation, as seen with quick returns, may not pose a major problem in relation to headache  
42 risk. This lack of association was found even though a high percentage of the nurses reported  
43 frequent quick returns.  
44  
45  
46  
47  
48  
49

50  
51 In the present study, frequent headache, migraine, and chronic headache were all associated  
52 with SWD. These novel findings suggest that nurses who do not cope well with shift work are  
53 at increased risk of other health complaints like headaches. However, our study cannot say  
54 anything about cause-and-effect. That is, it may be that headache increases the risk of SWD.  
55 Future studies should consequently focus on whether there may be common vulnerability  
56  
57  
58  
59  
60

1  
2  
3 factors (e.g. genetic, health behaviour, etc.) between headaches and sleep related disorders.  
4 Interestingly and surprisingly, TTH was not associated with SWD, suggesting that different  
5 pathophysiological mechanisms may be involved across the different types of headaches. This  
6 issue warrants further studies.  
7  
8  
9

10  
11 Insomnia disorder was associated with frequent headache, migraine, chronic headache, and  
12 medication-overuse headache, which is in line with the findings from several other studies.<sup>15</sup>  
13  
14<sup>44 45</sup> However, few studies have used formal diagnostic criteria for insomnia disorder, like the  
15 present study. Thus, one major asset with the present study was the use of ICSD and ICHD  
16 criteria for sleep disorders and headache classification, respectively. Surprisingly, TTH was  
17 not associated with insomnia disorder in our study, in contrast to two other population-based  
18 studies.<sup>37 46</sup> However, none of those studies used the formal diagnostic criteria for insomnia  
19 disorder. Lack of association between insomnia disorder and TTH may be related to  
20 methodological limitations, but suggests the need for more research, and especially studies  
21 with a longitudinal design. MOH was significantly associated with insomnia disorder, but not  
22 with any of the work-related variables. In fact, our data indicate that nurses with insomnia  
23 disorder had more than 7 times higher risk of MOH than those without insomnia disorder.  
24 This strong association warrants further studies.  
25  
26  
27  
28  
29  
30  
31  
32

### 33 **Strengths and limitations**

34  
35 The present study was based on a large and homogeneous sample of nurses that limits the  
36 influence from possible confounding variables. Other strengths were the use of validated  
37 headache diagnoses and a validated insomnia scale as well as criteria-based SWD diagnostics.  
38 Furthermore, the study did not have a primary focus on headache, it was one of many health  
39 outcomes. Thus, a possible selection bias related to headache was unlikely. In terms of  
40 limitations, it should be noted that the response rate in the first wave was low, which may  
41 make the interpretation of the data and conclusions less generalizable. Still, the response rate  
42 in wave 6 where the headache questionnaire was included was high. Due to the high number  
43 of participants in our survey, it was not feasible to apply the gold standard, i.e. a clinical  
44 interview by a physician experienced in headache and sleep diagnostics. For the same reason,  
45 prospective headache and sleep diaries were not feasible. However, the questionnaire-based  
46 headache diagnostic procedures have been included in several previous large population-  
47 based studies and have been validated against clinical interviews with a high degree of  
48 agreement.<sup>25 31 32</sup> A limitation of the headache questionnaire is that migraine and TTH are  
49  
50  
51  
52  
53  
54  
55  
56  
57  
58  
59  
60

1  
2  
3 mutually exclusive, i.e. the questionnaire only allows the participant to be diagnosed with the  
4 most bothersome headache subtype even though some might suffer from both migraine and  
5 TTH.<sup>25</sup> It is possible that differences between migraine and TTH are underestimated owing to  
6 the presence of people with TTH in the migraine group and vice versa, making the two groups  
7 more similar than they actually are. Thus, some caution is needed when interpreting the  
8 results. As migraine is hierarchically more important in the headache classification<sup>26</sup> than  
9 TTH, it is possible that there is an underestimation of TTH in the sample. However, the  
10 prevalence of the different headaches reported in the present study is similar to those reported  
11 previously,<sup>22 24 25 27 29</sup> strengthening the assumption of representativeness of the study  
12 population. The number of participants with chronic headache and MOH were low, limiting  
13 the statistical power in these analyses. In the logistic regressions we adjusted for several  
14 relevant confounders, like sex, age, percentage of full-time equivalent, marital status and  
15 children living at home, because such factors are known to influence shift work tolerance and  
16 headache.<sup>12 21</sup> However, other possible and relevant factors were not adjusted for, e.g.  
17 physical inactivity, stress, and psychological disturbances,<sup>14 21</sup> since data on these variables  
18 were not available. Lack of such adjustment should be taken into consideration when  
19 interpreting the results. Finally, it should be noted that the cross-sectional design does not  
20 permit any conclusions about causality in the relationship between headaches and work  
21 variables.  
22  
23  
24  
25  
26  
27  
28  
29  
30  
31  
32  
33

### 34 35 **Conclusion**

36 We found a significant association between headaches and SWD and insomnia disorder in our  
37 cohort of nurses. In fact, nurses with SWD reported higher prevalence of frequent headache,  
38 migraine, and chronic headache compared to nurses not having SWD. Similarly, nurses with  
39 insomnia disorder, compared to those without, reported higher prevalence of all types of  
40 headache, except TTH. Although we did not find any association between different types of  
41 headache and work schedule or quick returns, TTH was associated with high number of night  
42 shifts. Future longitudinal research should be conducted in order to investigate the  
43 causality/directionality of association between headaches and work variables.  
44  
45  
46  
47  
48  
49  
50  
51  
52

### 53 **Funding**

54 The study received a grant for practical administration and data collection from The Western  
55 Norway Regional Health Authority (grant number 911386, no personal payment/salary). The  
56  
57

Norwegian Nurses Organization has provided grants to cover some of the the running expenses of the SUSSH study. The study was further partly funded from Nordforsk, Nordic Program on Health and Welfare (74809).

### Competing interests statement

None declared.

### Data sharing

No additional data available.

### Contributorship statement

BB: contributed to the design of the study, data collection, data analysis, drafted the paper, and approved the final version.

SP: contributed to the design of the study, data collection, data analysis, revised the paper, and approved the final version.

BEM: contributed to the design of the study, data collection, data analysis, revised the paper, and approved the final version.

SW: contributed to the design of the study, data collection, data analysis, revised the paper, and approved the final version.

ESK: contributed to the design of the study, data analysis, revised the paper, and approved the final version.

### References

- 1 Kecklund G, Axelsson J. Health consequences of shift work and insufficient sleep. *BMJ* 2016;355:i5210.
- 2 Akerstedt T. Shift work and disturbed sleep/wakefulness. *Occup Med (Lond)* 2003;53:89-94.
- 3 Oyane NM, Pallesen S, Moen BE, Akerstedt T, Bjorvatn B. Associations between night work and anxiety, depression, insomnia, sleepiness and fatigue in a sample of Norwegian nurses. *PLoS ONE* 2013;8:e70228.
- 4 Eldevik MF, Flo E, Moen BE, Pallesen S, Bjorvatn B. Insomnia, excessive sleepiness, excessive fatigue, anxiety, depression and shift work disorder in nurses having less than 11 hours in-between shifts. *PLoS ONE* 2013;8:e70882.
- 5 Vedaa O, Pallesen S, Waage S et al. Short rest between shift intervals increases the risk of sick leave: a prospective registry study. *Occup Environ Med* 2017;74:496-501.
- 6 Flo E, Pallesen S, Moen BE, Waage S, Bjorvatn B. Short rest periods between work shifts predict sleep and health problems in nurses at 1-year follow-up. *Occup Environ Med* 2014;71:555-61.

- 1  
2  
3 7 Ferri P, Guadi M, Marcheselli L, Balduzzi S, Magnani D, Di Lorenzo R. The impact  
4 of shift work on the psychological and physical health of nurses in a general hospital:  
5 a comparison between rotating night shifts and day shifts. *Risk Manag Healthc Policy*  
6 2016;9:203-211.
- 7 8 Di Milia L, Waage S, Pallesen S, Bjorvatn B. Shift work disorder in a random  
8 population sample--prevalence and comorbidities. *PLoS ONE* 2013;8:e55306.
- 9 9 Wright KP, Jr., Bogan RK, Wyatt JK. Shift work and the assessment and management  
10 of shift work disorder (SWD). *Sleep Med Rev* 2013;17:41-54.
- 11 10 Waage S, Pallesen S, Moen BE et al. Predictors of shift work disorder among nurses: a  
12 longitudinal study. *Sleep Med* 2014;15:1449-55.
- 13 11 Waage S, Moen BE, Pallesen S et al. Shift work disorder among oil rig workers in the  
14 North Sea. *Sleep* 2009;32:558-65.
- 15 12 Flo E, Pallesen S, Mageroy N et al. Shift work disorder in nurses--assessment,  
16 prevalence and related health problems. *PLoS ONE* 2012;7:e33981.
- 17 13 Drake CL, Roehrs T, Richardson G, Walsh JK, Roth T. Shift work sleep disorder:  
18 prevalence and consequences beyond that of symptomatic day workers. *Sleep*  
19 2004;27:1453-62.
- 20 21 Houle TT, Butschek RA, Turner DP, Smitherman TA, Rains JC, Penzien DB. Stress  
22 and sleep duration predict headache severity in chronic headache sufferers. *Pain*  
23 2012;153:2432-40.
- 24 24 Kim J, Cho SJ, Kim WJ, Yang KI, Yun CH, Chu MK. Insufficient sleep is prevalent  
25 among migraineurs: a population-based study. *J Headache Pain* 2017;18:50.
- 26 26 Jakobsen GS, Timm AM, Hansen AM, Garde AH, Nabe-Nielsen K. The association  
27 between shift work and treatment-seeking migraine in Denmark. *Ergonomics*  
28 2017;60:1207-1217.
- 29 30 Alfredsson L, Akerstedt T, Mattsson M, Wilborg B. Self-reported health and well-  
31 being amongst night security guards: a comparison with the working population.  
32 *Ergonomics* 1991;34:525-30.
- 33 33 Portela LF, Rotenberg L, Waissmann W. Self-reported health and sleep complaints  
34 among nursing personnel working under 12 h night and day shifts. *Chronobiol Int*  
35 2004;21:859-70.
- 36 36 Jensen HI, Larsen JW, Thomsen TD. The impact of shift work on intensive care  
37 nurses' lives outside work: A cross-sectional study. *J Clin Nurs* 2018;27:e703-e709.
- 38 20 Ho KH, Benjamin KC. Perceived headache associations in Singapore: results of a  
39 randomized national survey. *Headache* 2001;41:164-70.
- 40 21 Molarius A, Tegelberg A, Ohrvik J. Socio-economic factors, lifestyle, and headache  
41 disorders - a population-based study in Sweden. *Headache* 2008;48:1426-37.
- 42 22 Wang Y, Xie J, Yang F et al. The prevalence of primary headache disorders and their  
43 associated factors among nursing staff in North China. *J Headache Pain* 2015;16:4.
- 44 23 Kuo WY, Huang CC, Weng SF et al. Higher migraine risk in healthcare professionals  
45 than in general population: a nationwide population-based cohort study in Taiwan. *J*  
46 *Headache Pain* 2015;16:102.
- 47 48 Jensen R, Stovner LJ. Epidemiology and comorbidity of headache. *Lancet Neurol*  
49 2008;7:354-61.
- 50 25 Linde M, Stovner LJ, Zwart JA, Hagen K. Time trends in the prevalence of headache  
51 disorders. The Nord-Trøndelag Health Studies (HUNT 2 and HUNT 3). *Cephalalgia*  
52 2011;31:585-96.
- 53 26 Headache Classification Committee of the International Headache Society. The  
54 International Classification of Headache Disorders, 3rd edition (beta version).  
55 *Cephalalgia* 2013;33:629-808.
- 56  
57  
58  
59  
60



- 1  
2  
3 27 Grande RB, Aaseth K, Gulbrandsen P, Lundqvist C, Russell MB. Prevalence of  
4 primary chronic headache in a population-based sample of 30- to 44-year-old persons.  
5 The Akershus study of chronic headache. *Neuroepidemiology* 2008;30:76-83.
- 6 28 Diener HC, Holle D, Solbach K, Gaul C. Medication-overuse headache: risk factors,  
7 pathophysiology and management. *Nat Rev Neurol* 2016;12:575-83.
- 8 29 Jonsson P, Hedenrud T, Linde M. Epidemiology of medication overuse headache in  
9 the general Swedish population. *Cephalalgia* 2011;31:1015-22.
- 10 30 Bjorvatn B, Mageroy N, Moen BE, Pallesen S, Waage S. Parasomnias are more  
11 frequent in shift workers than in day workers. *Chronobiol Int* 2015;32:1352-8.
- 12 31 Hagen K, Zwart JA, Aamodt AH et al. The validity of questionnaire-based diagnoses:  
13 the third Nord-Trondelag Health Study 2006-2008. *J Headache Pain* 2010;11:67-73.
- 14 32 -. A face-to-face interview of participants in HUNT 3: the impact of the screening  
15 question on headache prevalence. *J Headache Pain* 2008;9:289-94.
- 16 33 American Academy of Sleep Medicine. *The international classification of sleep  
17 disorders, 2nd ed.: Diagnostic and coding manual*. Westchester, IL, 2005.
- 18 34 Pallesen S, Bjorvatn B, Nordhus IH, Sivertsen B, Hjørnevik M, Morin CM. A new  
19 scale for measuring insomnia: the Bergen Insomnia Scale. *Perceptual and Motor  
20 Skills* 2008;107:691-706.
- 21 35 American Psychiatric Association. *Diagnostic and statistical manual of mental  
22 disorders. Text revision (DSM-IV-TR)*. Washington, DC: American Psychiatric  
23 Association, 2000.
- 24 36 -. *Diagnostic and Statistical Manual of Mental Disorders (DSM-5)*. Washington, DC:  
25 American Psychiatric Association, 2013.
- 26 37 Odegard SS, Engstrom M, Sand T, Stovner LJ, Zwart JA, Hagen K. Associations  
27 between sleep disturbance and primary headaches: the third Nord-Trondelag Health  
28 Study. *J Headache Pain* 2010;11:197-206.
- 29 38 Bjorvatn B, Pallesen S. A practical approach to circadian rhythm sleep disorders.  
30 *Sleep Med Rev* 2009;13:47-60.
- 31 39 Sack RL, Auckley D, Auger RR et al. Circadian rhythm sleep disorders: part I, basic  
32 principles, shift work and jet lag disorders. An American Academy of Sleep Medicine  
33 review. *Sleep* 2007;30:1460-83.
- 34 40 Knutsson A. Methodological aspects of shift-work research. *Chronobiol Int*  
35 2004;21:1037-47.
- 36 41 Rains JC, Davis RE, Smitherman TA. Tension-type headache and sleep. *Curr Neurol  
37 Neurosci Rep* 2015;15:520.
- 38 42 Engstrom M, Hagen K, Bjork M, Stovner LJ, Stjern M, Sand T. Sleep quality, arousal  
39 and pain thresholds in tension-type headache: a blinded controlled polysomnographic  
40 study. *Cephalalgia* 2014;34:455-63.
- 41 43 Bendtsen L, Jensen R. Treating tension-type headache -- an expert opinion. *Expert  
42 Opin Pharmacother* 2011;12:1099-109.
- 43 44 Tran DP, Spierings EL. Headache and insomnia: their relation reviewed. *Cranio*  
44 2013;31:165-70.
- 45 45 Uhlig BL, Engstrom M, Odegard SS, Hagen KK, Sand T. Headache and insomnia in  
46 population-based epidemiological studies. *Cephalalgia* 2014;34:745-51.
- 47 46 Rasmussen BK. Migraine and tension-type headache in a general population:  
48 precipitating factors, female hormones, sleep pattern and relation to lifestyle. *Pain*  
49 1993;53:65-72.
- 50  
51  
52  
53  
54  
55  
56  
57  
58  
59  
60

Table 1. Characteristics of the Norwegian nurses in the study.

|                                                           |                  |
|-----------------------------------------------------------|------------------|
| Sex (n=1578): Female                                      | 90.5%            |
| Age in wave 1 (n=1583): mean (SD)                         | 32.5 (8.5) years |
| Percentage of full-time equivalent (n=1536):              |                  |
| <50%                                                      | 3.9%             |
| 50-75%                                                    | 20.3%            |
| 76-90%                                                    | 16.5%            |
| >90%                                                      | 59.2%            |
| Married/cohabiting (n=1582): Yes                          | 76.5%            |
| Children living at home (n=1578): Yes                     | 63.3%            |
| Work schedule (n=1532):                                   |                  |
| Day only                                                  | 19.3%            |
| Evening only                                              | 0.4              |
| Two-shift rotation                                        | 32.4%            |
| Night shift only                                          | 6.6%             |
| Three-shift rotation                                      | 36.9%            |
| Other schedules including night shifts                    | 4.4%             |
| Number of night shifts last year (n=1534):                |                  |
| 0 night shifts                                            | 39.8%            |
| 1-20 night shifts                                         | 26.1%            |
| >20 night shifts                                          | 34.0%            |
| Number of quick returns last year (n=1511):               |                  |
| 0 quick returns                                           | 22.6%            |
| 1-20 quick returns                                        | 25.2%            |
| >20 quick returns                                         | 52.2%            |
| Shift work disorder (n=1567): Yes                         | 27.3%            |
| Insomnia disorder (n=1585): Yes                           | 31.7%            |
| Headache last year (n=1579): Yes                          | 56.0%            |
| Frequent headache ( $\geq 1$ day per month) (n=1585): Yes | 48.1%            |
| Migraine (n=1537): Yes                                    | 19.6%            |
| Tension-type headache (n=1559): Yes                       | 27.9%            |
| Chronic headache (n=1577): Yes                            | 2.3%             |
| Medication-overuse headache (n=1579): Yes                 | 1.2%             |

SD, standard deviation. n, number of nurses.



Table 2. Prevalence of different types of headache complaints among Norwegian nurses.

|                                        | Frequent headache <sup>1</sup><br>% (n) | Migraine<br>% (n)               | Tension-type<br>headache % (n) | Chronic headache <sup>2</sup><br>% (n) | Medication-overuse<br>headache % (n) |
|----------------------------------------|-----------------------------------------|---------------------------------|--------------------------------|----------------------------------------|--------------------------------------|
| Work schedule (n=1415-1459):           | 0.2 <sup>a</sup> , p=.979               | 2.5 <sup>a</sup> , p=.472       | 3.5 <sup>a</sup> , p=.321      | 2.3 <sup>a</sup> , p=.510              | 1.7 <sup>a</sup> , p=.637            |
| Day only                               | 47.3 (140)                              | 22.6 (65)                       | 24.5 (71)                      | 1.7 (5)                                | 1.0 (3)                              |
| Two-shift rotation                     | 48.7 (242)                              | 20.3 (98)                       | 26.1 (129)                     | 3.2 (16)                               | 1.6 (8)                              |
| Night shift only                       | 47.5 (48)                               | 16.3 (16)                       | 29.0 (29)                      | 2.0 (2)                                | 2.0 (2)                              |
| Three-shift rotation                   | 47.6 (269)                              | 18.8 (103)                      | 29.9 (165)                     | 2.1 (12)                               | 0.9 (5)                              |
| Night shifts last year (n=1489-1534):  | 3.4 <sup>a</sup> , p=.180               | 3.3 <sup>a</sup> , p=.188       | <b>6.9<sup>a</sup>, p=.032</b> | 0.4 <sup>a</sup> , p=.813              | 1.1 <sup>a</sup> , p=.578            |
| 0 night shifts                         | 47.8 (292)                              | 21.9 (130)                      | 24.4 (147)                     | 2.6 (16)                               | 1.5 (9)                              |
| 1-20 night shifts                      | 44.6 (179)                              | 18.0 (70)                       | 30.0 (118)                     | 2.0 (8)                                | 0.8 (3)                              |
| >20 night shifts                       | 50.8 (265)                              | 18.1 (92)                       | 30.9 (159)                     | 2.3 (12)                               | 1.2 (6)                              |
| Quick returns last year (n=1465-1511): | 0.2 <sup>a</sup> , p=.902               | 1.5 <sup>a</sup> , p=.480       | 2.4 <sup>a</sup> , p=.296      | 0.2 <sup>a</sup> , p=.885              | 0.8 <sup>a</sup> , p=.666            |
| 0 quick returns                        | 47.4 (162)                              | 22.1 (73)                       | 24.8 (83)                      | 2.1 (7)                                | 1.2 (4)                              |
| 1-20 quick returns                     | 48.8 (186)                              | 18.9 (70)                       | 29.6 (111)                     | 2.4 (9)                                | 0.8 (3)                              |
| >20 quick returns                      | 48.7 (384)                              | 19.1 (146)                      | 28.8 (224)                     | 2.5 (20)                               | 1.4 (11)                             |
| Shift work disorder (n=1521-1567):     | <b>36.9<sup>a</sup>, p&lt;.0005</b>     | <b>11.3<sup>a</sup>, p=.001</b> | 1.6 <sup>a</sup> , p=.208      | <b>5.7<sup>a</sup>, p=.017</b>         | 0.5 <sup>a</sup> , p=.491            |
| No                                     | 43.4 (494)                              | 17.7 (197)                      | 26.9 (301)                     | 1.8 (20)                               | 1.1 (12)                             |
| Yes                                    | 60.7 (260)                              | 25.6 (104)                      | 30.2 (127)                     | 4.0 (17)                               | 1.6 (7)                              |
| Insomnia disorder (n=1537-1585):       | <b>25.1<sup>a</sup>, p&lt;.0005</b>     | <b>10.1<sup>a</sup>, p=.001</b> | 0.0 <sup>a</sup> , p=.983      | <b>9.7<sup>a</sup>, p=.002</b>         | <b>15.6<sup>a</sup>, p&lt;.0005</b>  |
| No                                     | 43.8 (474)                              | 17.4 (184)                      | 28.0 (297)                     | 1.5 (16)                               | 0.5 (5)                              |
| Yes                                    | 57.5 (289)                              | 24.5 (118)                      | 27.8 (138)                     | 4.2 (21)                               | 2.8 (14)                             |

<sup>1</sup>Headache  $\geq 1$  days per month. <sup>2</sup>Headache >14 days per month.

<sup>a</sup>Pearson Chi-square, with Yates' correction for continuity when used in a 2x2 table. Significant findings are shown in **bold**.

Table 3. Separate adjusted logistic regression analyses with different headache types as the dependent variables among Norwegian nurses.

| Independent variables   | Frequent headache <sup>1</sup><br>OR (95% CI) <sup>a</sup><br>n=1439-1519 | Migraine<br>OR (95% CI) <sup>a</sup><br>n=1398-1476 | Tension-type headache<br>OR (95% CI) <sup>a</sup><br>n=1416-1495 | Chronic headache <sup>2</sup><br>OR (95% CI) <sup>a</sup><br>n=1432-1512 | Medication-overuse<br>headache OR (95% CI) <sup>a</sup><br>n=1434-1514 |
|-------------------------|---------------------------------------------------------------------------|-----------------------------------------------------|------------------------------------------------------------------|--------------------------------------------------------------------------|------------------------------------------------------------------------|
| Work schedule           |                                                                           |                                                     |                                                                  |                                                                          |                                                                        |
| Day only                | 1.00                                                                      | 1.00                                                | 1.00                                                             | 1.00                                                                     | 1.00                                                                   |
| Two-shift               | 1.07 (0.80-1.44)                                                          | 0.89 (0.62-1.28)                                    | 1.11 (0.79-1.57)                                                 | 1.91 (0.68-5.32)                                                         | 1.49 (0.39-5.80)                                                       |
| Night only              | 1.07 (0.65-1.77)                                                          | 0.75 (0.39-1.44)                                    | 1.30 (0.74-2.28)                                                 | 1.18 (0.20-6.88)                                                         | 2.39 (0.32-17.65)                                                      |
| Three-shift             | 1.01 (0.76-1.35)                                                          | 0.79 (0.55-1.14)                                    | 1.31 (0.94-1.83)                                                 | 1.22 (0.42-3.56)                                                         | 0.86 (0.20-3.70)                                                       |
| Number of night shifts  |                                                                           |                                                     |                                                                  |                                                                          |                                                                        |
| 0 night shifts          | 1.00                                                                      | 1.00                                                | 1.00                                                             | 1.00                                                                     | 1.00                                                                   |
| 1-20 night shifts       | 0.86 (0.66-1.11)                                                          | 0.78 (0.56-1.09)                                    | 1.27 (0.95-1.70)                                                 | 0.73 (0.30-1.74)                                                         | 0.51 (0.14-1.95)                                                       |
| >20 night shifts        | 1.15 (0.90-1.47)                                                          | 0.80 (0.58-1.09)                                    | <b>1.41 (1.07-1.86)</b>                                          | 0.82 (0.38-1.80)                                                         | 0.78 (0.27-2.29)                                                       |
| Number of quick returns |                                                                           |                                                     |                                                                  |                                                                          |                                                                        |
| 0 quick returns         | 1.00                                                                      | 1.00                                                | 1.00                                                             | 1.00                                                                     | 1.00                                                                   |
| 1-20 quick returns      | 1.09 (0.81-1.46)                                                          | 0.83 (0.57-1.21)                                    | 1.30 (0.92-1.82)                                                 | 1.12 (0.41-3.05)                                                         | 0.66 (0.15-3.01)                                                       |
| >20 quick returns       | 1.06 (0.82-1.39)                                                          | 0.81 (0.58-1.12)                                    | 1.23 (0.91-1.67)                                                 | 1.21 (0.50-2.95)                                                         | 1.18 (0.37-3.83)                                                       |
| Shift work disorder     |                                                                           |                                                     |                                                                  |                                                                          |                                                                        |
| No                      | 1.00                                                                      | 1.00                                                | 1.00                                                             | 1.00                                                                     | 1.00                                                                   |
| Yes                     | <b>2.04 (1.62-2.59)</b>                                                   | <b>1.60 (1.21-2.12)</b>                             | 1.19 (0.92-1.54)                                                 | <b>2.45 (1.25-4.80)</b>                                                  | 1.67 (0.64-4.40)                                                       |
| Insomnia disorder       |                                                                           |                                                     |                                                                  |                                                                          |                                                                        |
| No                      | 1.00                                                                      | 1.00                                                | 1.00                                                             | 1.00                                                                     | 1.00                                                                   |
| Yes                     | <b>1.79 (1.43-2.23)</b>                                                   | <b>1.55 (1.18-2.02)</b>                             | 1.01 (0.79-1.29)                                                 | <b>3.03 (1.54-5.95)</b>                                                  | <b>7.62 (2.48-23.41)</b>                                               |

<sup>1</sup>Headache  $\geq 1$  days per month. <sup>2</sup>Headache >14 days per month.

<sup>a</sup>Separate logistic regression analyses for each independent variable with adjustment for sex, age, percentage of full-time equivalent, marital status, and children living at home.

Significant findings are shown in **bold**.

## STROBE Statement—checklist of items that should be included in reports of observational studies

|                              | Item No | Recommendation                                                                                                                                                                                                                                                                                                                                                                                                                                                                                                                                                                                                                                                                                   |
|------------------------------|---------|--------------------------------------------------------------------------------------------------------------------------------------------------------------------------------------------------------------------------------------------------------------------------------------------------------------------------------------------------------------------------------------------------------------------------------------------------------------------------------------------------------------------------------------------------------------------------------------------------------------------------------------------------------------------------------------------------|
| <b>Title and abstract</b>    | 1       | (a) Indicate the study's design with a commonly used term in the title or the abstract<br>(b) Provide in the abstract an informative and balanced summary of what was done and what was found                                                                                                                                                                                                                                                                                                                                                                                                                                                                                                    |
| See page 1 and 3             |         |                                                                                                                                                                                                                                                                                                                                                                                                                                                                                                                                                                                                                                                                                                  |
| <b>Introduction</b>          |         |                                                                                                                                                                                                                                                                                                                                                                                                                                                                                                                                                                                                                                                                                                  |
| Background/rationale         | 2       | Explain the scientific background and rationale for the investigation being reported                                                                                                                                                                                                                                                                                                                                                                                                                                                                                                                                                                                                             |
| See page 5 and 6             |         |                                                                                                                                                                                                                                                                                                                                                                                                                                                                                                                                                                                                                                                                                                  |
| Objectives                   | 3       | State specific objectives, including any prespecified hypotheses                                                                                                                                                                                                                                                                                                                                                                                                                                                                                                                                                                                                                                 |
| See page 6                   |         |                                                                                                                                                                                                                                                                                                                                                                                                                                                                                                                                                                                                                                                                                                  |
| <b>Methods</b>               |         |                                                                                                                                                                                                                                                                                                                                                                                                                                                                                                                                                                                                                                                                                                  |
| Study design                 | 4       | Present key elements of study design early in the paper                                                                                                                                                                                                                                                                                                                                                                                                                                                                                                                                                                                                                                          |
| See page 6 and 7             |         |                                                                                                                                                                                                                                                                                                                                                                                                                                                                                                                                                                                                                                                                                                  |
| Setting                      | 5       | Describe the setting, locations, and relevant dates, including periods of recruitment, exposure, follow-up, and data collection                                                                                                                                                                                                                                                                                                                                                                                                                                                                                                                                                                  |
| See page 6 and 7             |         |                                                                                                                                                                                                                                                                                                                                                                                                                                                                                                                                                                                                                                                                                                  |
| Participants                 | 6       | (a) <i>Cohort study</i> —Give the eligibility criteria, and the sources and methods of selection of participants. Describe methods of follow-up<br><i>Case-control study</i> —Give the eligibility criteria, and the sources and methods of case ascertainment and control selection. Give the rationale for the choice of cases and controls<br><i>Cross-sectional study</i> —Give the eligibility criteria, and the sources and methods of selection of participants<br>(b) <i>Cohort study</i> —For matched studies, give matching criteria and number of exposed and unexposed<br><i>Case-control study</i> —For matched studies, give matching criteria and the number of controls per case |
| See page 6                   |         |                                                                                                                                                                                                                                                                                                                                                                                                                                                                                                                                                                                                                                                                                                  |
| Variables                    | 7       | Clearly define all outcomes, exposures, predictors, potential confounders, and effect modifiers. Give diagnostic criteria, if applicable                                                                                                                                                                                                                                                                                                                                                                                                                                                                                                                                                         |
| See page 7 and 8             |         |                                                                                                                                                                                                                                                                                                                                                                                                                                                                                                                                                                                                                                                                                                  |
| Data sources/<br>measurement | 8*      | For each variable of interest, give sources of data and details of methods of assessment (measurement). Describe comparability of assessment methods if there is more than one group                                                                                                                                                                                                                                                                                                                                                                                                                                                                                                             |
| See page 6, 7 and 8          |         |                                                                                                                                                                                                                                                                                                                                                                                                                                                                                                                                                                                                                                                                                                  |
| Bias                         | 9       | Describe any efforts to address potential sources of bias                                                                                                                                                                                                                                                                                                                                                                                                                                                                                                                                                                                                                                        |
| See page 12                  |         |                                                                                                                                                                                                                                                                                                                                                                                                                                                                                                                                                                                                                                                                                                  |
| Study size                   | 10      | Explain how the study size was arrived at                                                                                                                                                                                                                                                                                                                                                                                                                                                                                                                                                                                                                                                        |
| See page 6                   |         |                                                                                                                                                                                                                                                                                                                                                                                                                                                                                                                                                                                                                                                                                                  |
| Quantitative variables       | 11      | Explain how quantitative variables were handled in the analyses. If applicable, describe which groupings were chosen and why                                                                                                                                                                                                                                                                                                                                                                                                                                                                                                                                                                     |
| See page 8                   |         |                                                                                                                                                                                                                                                                                                                                                                                                                                                                                                                                                                                                                                                                                                  |
| Statistical methods          | 12      | (a) Describe all statistical methods, including those used to control for confounding<br>(b) Describe any methods used to examine subgroups and interactions                                                                                                                                                                                                                                                                                                                                                                                                                                                                                                                                     |

(c) Explain how missing data were addressed

(d) *Cohort study*—If applicable, explain how loss to follow-up was addressed

*Case-control study*—If applicable, explain how matching of cases and controls was addressed

*Cross-sectional study*—If applicable, describe analytical methods taking account of sampling strategy

(e) Describe any sensitivity analyses

See page 8 and 9

## Results

Participants 13\* (a) Report numbers of individuals at each stage of study—eg numbers potentially eligible, examined for eligibility, confirmed eligible, included in the study, completing follow-up, and analysed  
(b) Give reasons for non-participation at each stage  
(c) Consider use of a flow diagram

See page 9

Descriptive data 14\* (a) Give characteristics of study participants (eg demographic, clinical, social) and information on exposures and potential confounders  
(b) Indicate number of participants with missing data for each variable of interest  
(c) *Cohort study*—Summarise follow-up time (eg, average and total amount)

Page 9 and 17

Outcome data 15\* *Cohort study*—Report numbers of outcome events or summary measures over time  
*Case-control study*—Report numbers in each exposure category, or summary measures of exposure  
*Cross-sectional study*—Report numbers of outcome events or summary measures

Page 9 and 10

Main results 16 (a) Give unadjusted estimates and, if applicable, confounder-adjusted estimates and their precision (eg, 95% confidence interval). Make clear which confounders were adjusted for and why they were included  
(b) Report category boundaries when continuous variables were categorized  
(c) If relevant, consider translating estimates of relative risk into absolute risk for a meaningful time period

Page 18 and 19

Other analyses 17 Report other analyses done—eg analyses of subgroups and interactions, and sensitivity analyses

Page 18 and 19

## Discussion

Key results 18 Summarise key results with reference to study objectives

Page 10

Limitations 19 Discuss limitations of the study, taking into account sources of potential bias or imprecision. Discuss both direction and magnitude of any potential bias

Page 12

Interpretation 20 Give a cautious overall interpretation of results considering objectives, limitations, multiplicity of analyses, results from similar studies, and other relevant evidence

Page 10-12

Generalisability 21 Discuss the generalisability (external validity) of the study results

Page 12

**Other information**

---

Funding 22 Give the source of funding and the role of the funders for the present study and, if applicable, for the original study on which the present article is based

Page 13

\*Give information separately for cases and controls in case-control studies and, if applicable, for exposed and unexposed groups in cohort and cross-sectional studies.

**Note:** An Explanation and Elaboration article discusses each checklist item and gives methodological background and published examples of transparent reporting. The STROBE checklist is best used in conjunction with this article (freely available on the Web sites of PLoS Medicine at <http://www.plosmedicine.org/>, Annals of Internal Medicine at <http://www.annals.org/>, and Epidemiology at <http://www.epidem.com/>). Information on the STROBE Initiative is available at [www.strobe-statement.org](http://www.strobe-statement.org).
